# Supplementary material for: Palladium-catalyzed ortho C–H bond alkylation of benzylamides with α-bromo ketones
Source: Royal Society of Chemistry journal article supplement (doi:10.1039/c6ra07450b), 2016-01-01
Supplement: c6ra07450b1.pdf [file c6ra07450b1.pdf]

# Palladium-Catalyzed *ortho* C–H Bond Alkylation of Benzylamides with $\alpha$ -Bromo Ketones

Jiao Song,<sup>a</sup> Wenbo Chen,<sup>a</sup> Yunjie Zhao,<sup>a</sup> Chenglong Li,<sup>a</sup> Guang Liang<sup>\*a</sup> and Lehao  
Huang<sup>\*a,b</sup>

<sup>a</sup>*Chemical Biology Research Center, School of Pharmaceutical Science, Wenzhou  
Medical University, Wenzhou, Zhejiang 325035, People's Republic of China*

<sup>b</sup>*Wenzhou Medical University Renji College, Wenzhou, Zhejiang 325035, People's  
Republic of China*

E-mail: wzmcliangguang@163.com.

E-mail: hlh1023@163.com

## Supporting Information

### Content

|                                                                                                        |         |
|--------------------------------------------------------------------------------------------------------|---------|
| Preparation and Characterization of Benzylamide Compounds <b>1a–j</b> .....                            | S2-S5   |
| Optimization of the reaction conditions of <b>3z'b</b> .....                                           | S6      |
| <sup>1</sup> H NMR and <sup>13</sup> C NMR spectra of Benzylamide Compounds <b>1a–j</b> .....          | S6-S16  |
| <sup>1</sup> H NMR and <sup>13</sup> C NMR spectra of Products <b>3a–x</b> .....                       | S17-S46 |
| <sup>1</sup> H NMR and <sup>13</sup> C NMR spectra of 3-Arylisoquinoline Derivatives <b>4a–d</b> ..... | S47-S50 |

## Preparation of Benzylamide Compounds 1a–j.

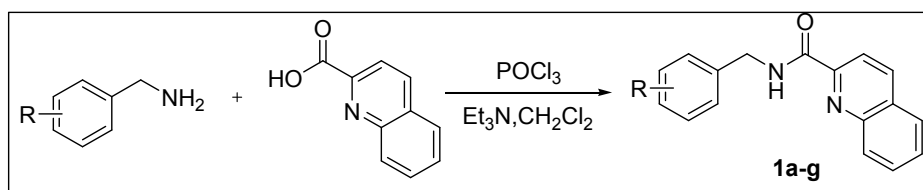

Quinoline-2-carboxylic acid (20 mmol, 3.46 g), benzylamine derivatives (20 mmol), and Et<sub>3</sub>N (40 mmol, 5.6 mL) were dissolved in CH<sub>2</sub>Cl<sub>2</sub> (40 mL), and addition of POCl<sub>3</sub> (3.76 mL) was added dropwise at 0 °C. The reaction mixture was stirred at 0 °C for 0.5 h. Subsequently, the reaction was performed at room temperature for about 2 h until benzylamine derivative was consumed completely. At the conclusion of the reaction, the reaction mixture was allowed to cool to 0 °C, and ice–water was added slowly to quench the reaction. The organic layer was collected, and the aqueous phase was extracted with CH<sub>2</sub>Cl<sub>2</sub> (3 × 20 mL). The combined organic phases were washed with saturated NaHCO<sub>3</sub> (2 × 40 mL) and dried over MgSO<sub>4</sub>. The solvent was evaporated under reduced pressure, and the residue was purified by silica gel flash chromatography (eluent, ethyl acetate/petroleum ether = 1/6 v/v) to give the desired product.

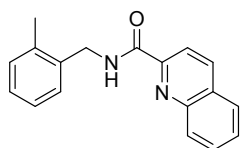

*N*-(2-Methylbenzyl)quinoline-2-carboxamide (**1a**, CAS no. 879307-42-3). 2.76 g, 50% yield; white solid; mp 95–96 °C; <sup>1</sup>H NMR (500 MHz, CDCl<sub>3</sub>) δ 8.47 (s, 1H), 8.35 (d, *J* = 8.5 Hz, 1H), 8.27 (d, *J* = 8.5 Hz, 1H), 8.04 (d, *J* = 8.0 Hz, 1H), 7.83 (d, *J* = 8.0 Hz, 1H), 7.70 (t, *J* = 8.0 Hz, 1H), 7.57 (t, *J* = 7.5 Hz, 1H), 7.36 (d, *J* = 7.0 Hz, 1H), 7.20 (m, 3H), 4.72 (d, *J* = 6.0 Hz, 2H), 2.39 (s, 3H); <sup>13</sup>C NMR (125 MHz, CDCl<sub>3</sub>) δ 159.0, 144.5, 141.3, 132.2, 131.3, 131.2, 130.7, 125.3, 124.8, 124.5, 124.1, 123.3, 122.6, 122.5, 121.0, 113.7, 36.5, 13.9.

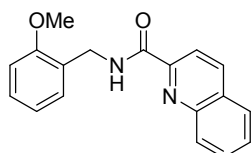

*N*-(2-Methoxybenzyl)quinoline-2-carboxamide (**1b**, CAS no. 224796-49-0). 3.04 g, 52% yield; white solid; mp 106–107 °C; <sup>1</sup>H NMR (500 MHz, CDCl<sub>3</sub>) δ 8.72 (s, 1H), 8.30 (d, *J* = 8.5 Hz, 1H), 8.22 (d, *J* = 8.5 Hz, 1H), 8.04 (d, *J* = 8.5 Hz, 1H), 7.80 (d, *J* = 8.0 Hz, 1H), 7.69 (d, *J* = 7.0 Hz, 1H), 7.54 (t, *J* = 7.0 Hz, 1H), 7.38 (t, *J* = 7.5 Hz, 1H), 7.25 (d, *J* = 8.0 Hz, 1H), 6.92 (t, *J* = 7.0 Hz, 1H), 6.87 (d, *J* = 8.5 Hz, 1H), 4.74 (d, *J* = 6.0 Hz, 2H), 3.88 (s, 3H); <sup>13</sup>C NMR (125 MHz, CDCl<sub>3</sub>) δ 159.0, 152.5, 144.9, 141.3, 132.1, 124.7, 124.5, 124.3, 124.0, 123.5, 122.5, 122.4, 121.2, 115.4, 113.7, 105.2, 50.2, 34.0.

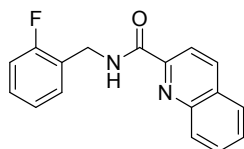

*N*-(2-Fluorobenzyl)quinoline-2-carboxamide (**1c**, CAS no. 731012-39-8). 3.08 g, 55% yield; white solid; mp 89–90 °C; <sup>1</sup>H NMR (500 MHz, CDCl<sub>3</sub>) δ 8.70 (s, 1H), 8.30 (d, *J* = 8.5 Hz, 1H), 8.21 (d, *J* = 8.5 Hz, 1H), 8.04 (d, *J* = 8.5 Hz, 1H), 7.78 (d, *J* = 8.0 Hz, 1H), 7.67 (t, *J* = 7.0 Hz, 1H), 7.53 (t, *J* = 7.0 Hz, 1H), 7.42 (t, *J* = 8.0 Hz, 1H), 7.20 (m, 1H), 7.03 (m, 2H), 4.76 (d, *J* = 6.5 Hz, 2H); <sup>13</sup>C NMR (125 MHz, CDCl<sub>3</sub>) δ 164.5, 162.0, 161.1, 149.6, 146.5, 137.5, 130.2, 130.1, 130.0, 129.7, 129.4, 129.3, 129.2, 127.9, 127.7, 125.4, 125.3, 124.3, 124.2, 118.9, 115.5, 115.3, 37.5, 37.4.

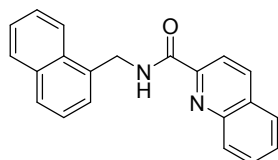

*N*-((naphthalen-4-yl)methyl)quinoline-2-carboxamide (**1d**). 3.25 g, 52% yield; white solid; mp 154–155 °C; <sup>1</sup>H NMR (500 MHz, CDCl<sub>3</sub>) δ 8.58 (s, 1H), 8.36 (d, *J* = 8.5 Hz, 1H), 8.27 (d, *J* = 9.0 Hz, 1H), 8.15 (d, *J* = 8.0 Hz, 1H), 7.97 (t, *J* = 8.0 Hz, 1H), 7.86 (d, *J* = 6.0 Hz, 1H), 7.81 (d, *J* = 8.0 Hz, 2H), 7.66 (t, *J* = 6.5 Hz, 1H), 7.54 (m, 3H), 7.49 (t, *J* = 8.0 Hz, 1H), 7.44 (t, *J* = 7.0 Hz, 1H), 5.17 (d, *J* = 5.5 Hz, 2H); <sup>13</sup>C NMR (125 MHz, CDCl<sub>3</sub>) δ 164.2, 149.6, 146.5, 137.5, 133.9, 133.7, 131.6, 130.0, 129.7, 129.3, 128.8, 128.6, 127.9, 127.7, 126.7, 126.6, 126.0, 125.5, 123.6, 119.0, 41.7. HRMS (ESI) calcd for C<sub>21</sub>H<sub>16</sub>N<sub>2</sub>O [M + H]<sup>+</sup> 313.1335, found 313.1334.

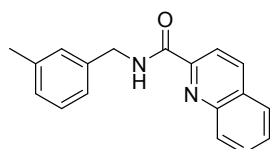

*N*-(3-methylbenzyl)quinoline-2-carboxamide (**1e**). 2.94 g, 53% yield; white solid; mp 81–82 °C; <sup>1</sup>H NMR (500 MHz, CDCl<sub>3</sub>) δ 8.63 (s, 1H), 8.35 (d, *J* = 8.0 Hz, 1H), 8.28 (d, *J* = 8.5 Hz, 1H), 8.05 (d, *J* = 8.0 Hz, 1H), 7.84 (d, *J* = 8.0 Hz, 1H), 7.71 (t, *J* = 7.5 Hz, 1H), 7.58 (t, *J* = 8.0 Hz, 1H), 7.17 (m, 4H), 4.69 (d, *J* = 5.5 Hz, 2H), 2.33 (s, 3H); <sup>13</sup>C NMR (125 MHz, CDCl<sub>3</sub>) δ 159.2, 144.5, 141.3, 133.2, 133.0, 132.2, 124.8, 124.5, 124.1, 123.5, 123.4, 123.0, 122.7, 122.5, 119.7, 113.7, 38.4, 16.2. HRMS (ESI) calcd for C<sub>18</sub>H<sub>16</sub>N<sub>2</sub>O [M + H]<sup>+</sup> 277.1335, found 277.1332.

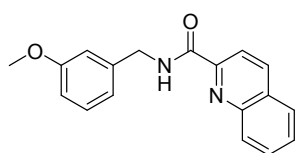

*N*-(3-methoxybenzyl)quinoline-2-carboxamide (**1f**). 3.97 g, 68% yield; white solid; mp 75–76 °C; <sup>1</sup>H NMR (500 MHz, CDCl<sub>3</sub>) δ 8.62 (s, 1H), 8.34 (d, *J* = 8.0 Hz, 1H), 8.29 (t, *J* = 8.5 Hz, 1H), 8.05 (d, *J* = 8.0 Hz, 1H), 7.85 (t, *J* = 6.0 Hz, 1H), 7.71 (t, *J* = 6.5 Hz, 1H), 7.58 (t, *J* = 6.5 Hz, 1H), 7.26 (t, *J* = 7.5 Hz, 1H), 6.99 (d, *J* = 7.5 Hz, 1H), 6.95 (s, 1H), 6.82 (d, *J* = 8.0 Hz, 1H), 4.71 (d, *J* = 5.5 Hz, 2H), 3.78 (d, *J* = 3.5 Hz, 3H); <sup>13</sup>C NMR (125 MHz, CDCl<sub>3</sub>) δ 164.5, 160.0, 149.7, 146.5, 140.0, 137.5, 130.1, 129.8, 129.7, 129.4, 127.9, 127.7, 120.1, 119.0, 113.5, 113.0, 55.3, 43.6; HRMS (ESI) calcd for C<sub>18</sub>H<sub>16</sub>N<sub>2</sub>O<sub>2</sub> [M + H]<sup>+</sup> 293.1285, found 293.1283.

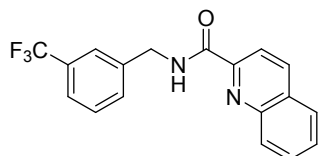

*N*-(3-(trifluoromethyl)benzyl)quinoline-2-carboxamide (**1g**). 4.55 g, 69% yield; white solid; mp 116–117 °C; <sup>1</sup>H NMR (500 MHz, CDCl<sub>3</sub>) δ 8.74 (s, 1H), 8.34 (d, *J* = 8.5 Hz, 1H), 8.31 (d, *J* = 8.5 Hz, 1H), 8.08 (d, *J* = 8.5 Hz, 1H), 7.87 (d, *J* = 8.5 Hz, 1H), 7.74 (t, *J* = 7.0 Hz, 1H), 7.64 (s, 1H), 7.60 (t, *J* = 8.5 Hz, 2H), 7.53 (d, *J* = 7.5 Hz, 1H), 7.45 (t, *J* = 7.5 Hz, 1H), 4.78 (d, *J* = 6.5 Hz, 2H); <sup>13</sup>C NMR (125 MHz, CDCl<sub>3</sub>) δ 164.7, 149.5, 146.5, 139.5, 137.6, 131.4, 131.2, 130.9, 130.6, 130.2, 129.7, 129.4, 129.2, 128.0, 127.7, 127.3, 125.2, 124.7, 124.6, 124.5, 124.4, 124.3, 124.2, 124.1, 124.0, 123.0, 120.8, 118.9, 43.1; HRMS (ESI) calcd for C<sub>18</sub>H<sub>13</sub>F<sub>3</sub>N<sub>2</sub>O [M + H]<sup>+</sup> 331.1053, found 331.1050.

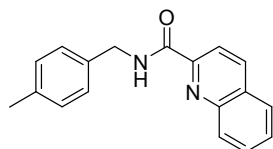

*N*-(4-methylbenzyl)quinoline-2-carboxamide (**1h**). 3.66 g, 66% yield; white solid; mp 77–78 °C; <sup>1</sup>H NMR (500 MHz, CDCl<sub>3</sub>) δ 8.58 (s, 1H), 8.34 (d, *J* = 8.5 Hz, 1H), 8.30 (d, *J* = 8.5 Hz, 1H), 8.05 (d, *J* = 8.5 Hz, 1H), 7.86 (d, *J* = 8.0 Hz, 1H), 7.73 (t, *J* = 7.5 Hz, 1H), 7.59 (t, *J* = 8.5 Hz, 1H), 7.31 (d, *J* = 8.0 Hz, 2H), 7.17 (d, *J* = 8.0 Hz, 2H), 4.70 (d, *J* = 6.5 Hz, 2H), 2.34 (s, 3H); <sup>13</sup>C NMR (125 MHz, CDCl<sub>3</sub>) δ 159.2, 144.6, 141.3, 132.2, 131.9, 130.1, 124.8, 124.4, 124.2, 124.1, 122.7, 122.6, 122.5, 113.7, 38.2, 15.9; HRMS (ESI) calcd for C<sub>18</sub>H<sub>16</sub>N<sub>2</sub>O [M + H]<sup>+</sup> 277.1335, found 277.1333.

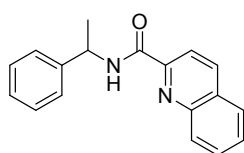

*N*-(1-Phenylethyl)quinoline-2-carboxamide (**1i**, CAS no. 361984-03-4). 2.98 g, 54% yield; white solid; mp 95–96 °C. <sup>1</sup>H NMR (500 MHz, CDCl<sub>3</sub>) δ 8.61 (d, *J* = 8.0 Hz, 1H), 8.30 (d, *J* = 7.5 Hz, 1H), 8.18 (d, *J* = 8.0 Hz, 1H), 8.07 (d, *J* = 8.0 Hz, 1H), 7.75 (d, *J* = 8.0 Hz, 1H), 7.65 (t, *J* = 7.5 Hz, 1H), 7.50 (t, *J* = 8.0 Hz, 1H), 7.42 (d, *J* = 8.0 Hz, 2H), 7.31 (t, *J* = 8.0 Hz, 2H), 7.23 (t, *J* = 7.0 Hz, 1H), 5.40 (quint, *J* = 7.5 Hz, 1H), 1.63 (d, *J* = 7.0 Hz, 3H); <sup>13</sup>C NMR (125 MHz, CDCl<sub>3</sub>) δ 163.6, 149.9, 146.5, 143.4, 137.5, 130.1, 129.7, 129.4, 128.7, 127.9, 127.8, 127.4, 126.3, 118.9, 49.0, 22.1.

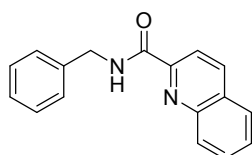

*N*-Benzylquinoline-2-carboxamide (**1j**, CAS no. 6019-43-8). 2.83 g, 54% yield; white solid; mp 116–117 °C. <sup>1</sup>H NMR (400 MHz, CDCl<sub>3</sub>) δ 8.65 (s, 1H), 8.34 (d, *J* = 8.8 Hz, 1H), 8.27 (d, *J* = 8.4 Hz, 1H), 8.04 (d, *J* = 8.4 Hz, 1H), 7.84 (d, *J* = 8.0 Hz, 1H), 7.71 (t, *J* = 7.6 Hz, 1H), 7.57 (t, *J* = 7.6 Hz, 1H), 7.40 (d, *J* = 7.2 Hz, 2H), 7.34 (t, *J* = 7.6 Hz, 2H), 7.26 (t, *J* = 7.2 Hz, 1H), 4.73 (d, *J* = 6.4 Hz, 2H); <sup>13</sup>C NMR (100 MHz, CDCl<sub>3</sub>) δ 164.5, 149.7, 146.5, 138.3, 137.5, 130.1, 129.7, 129.3, 128.8, 128.0, 127.9, 127.8, 127.5, 119.0, 43.6.

**Table 3** Optimization of the reaction conditions<sup>a</sup>

| 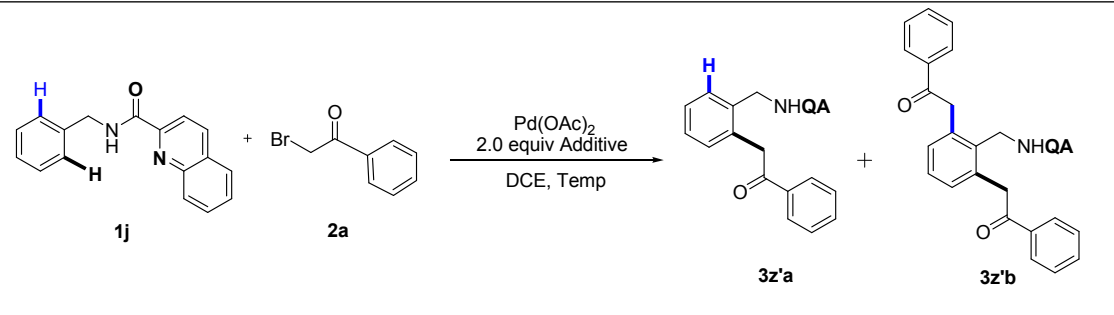 |                              |                                 |           |            |           |                     |                     |
|------------------------------------------------------------------------------------|------------------------------|---------------------------------|-----------|------------|-----------|---------------------|---------------------|
| Entry                                                                              | Pd(OAc) <sub>2</sub> (mol %) | Additive                        | 2a(equiv) | T(°C)      | Time (h)  | 3za(%) <sup>b</sup> | 3zb(%) <sup>b</sup> |
| 1                                                                                  | 10                           | PhCOOK                          | 3         | 90         | 12        | 34                  | 33                  |
| 2                                                                                  | 10                           | Na <sub>2</sub> CO <sub>3</sub> | 3         | 90         | 12        | 36                  | 38                  |
| 3                                                                                  | 10                           | PhCOOK                          | 4         | 90         | 12        | 38                  | 30                  |
| 4                                                                                  | 10                           | PhCOOK                          | 3         | 90         | <b>48</b> | 34                  | 33                  |
| 5                                                                                  | <b>15</b>                    | PhCOOK                          | 3         | <b>130</b> | 12        | 35                  | 34                  |
| 6                                                                                  | <b>15</b>                    | Na <sub>2</sub> CO <sub>3</sub> | 3         | <b>130</b> | 12        | 32                  | 30                  |

<sup>a</sup>Reaction conditions: **1j** (0.25 mmol, 69 mg), Pd(OAc)<sub>2</sub> (0.025 mmol, 6 mg),  $\alpha$ -bromo ketones (0.5 mmol), PhCOOK (0.5 mmol, 80 mg), DCE (2 mL), 90 °C, 12 h.

<sup>b</sup>Isolated yields.

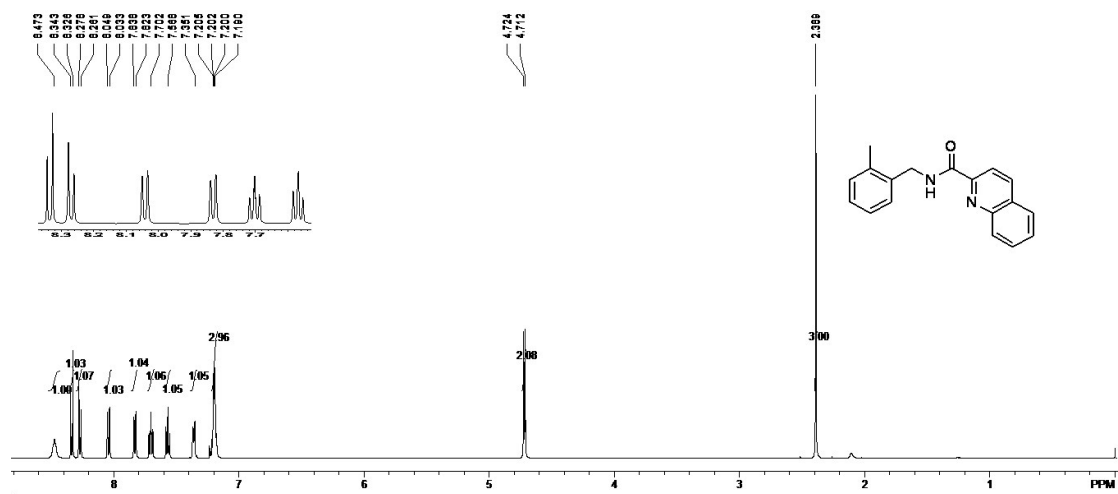

<sup>1</sup>H NMR of product **1a**

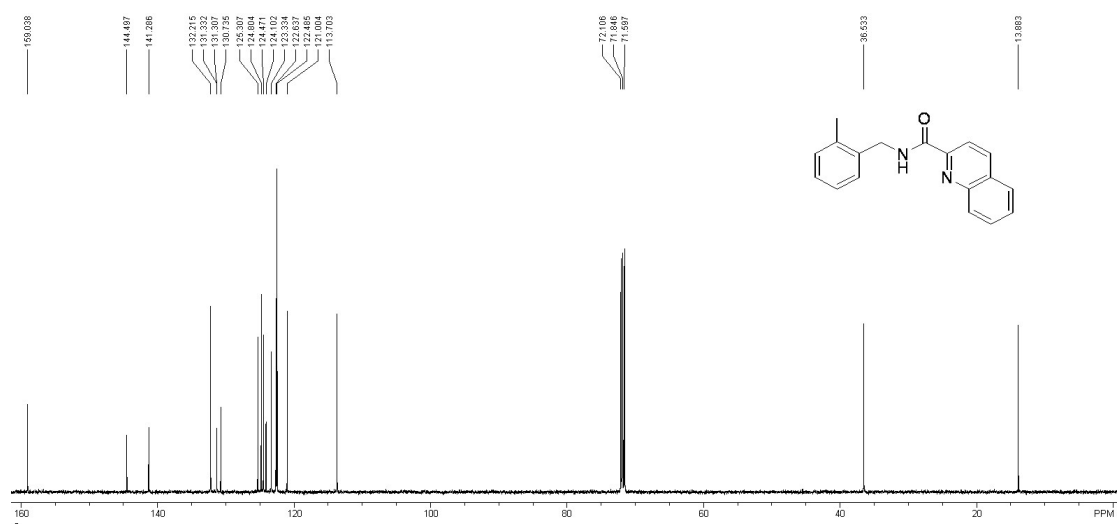

<sup>13</sup>C NMR of product **1a**





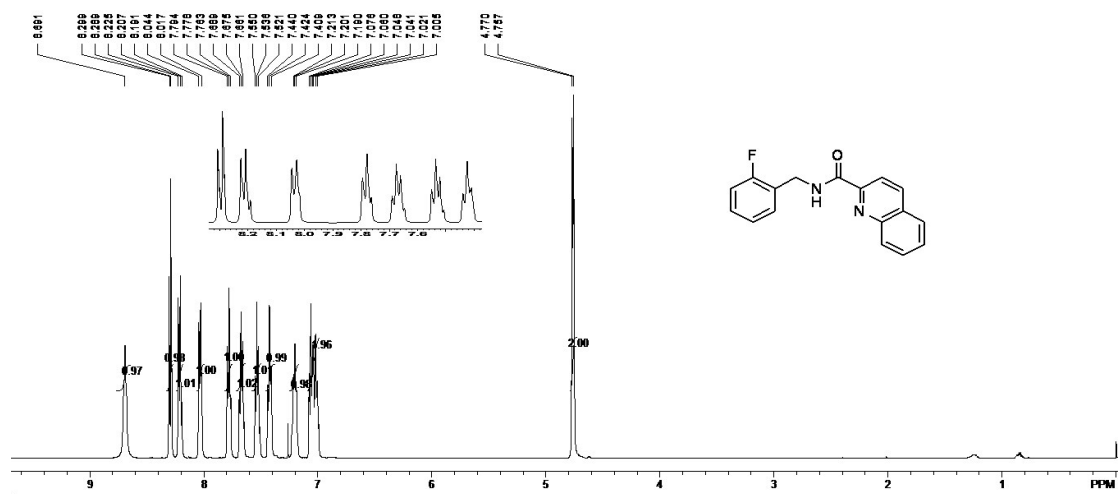

<sup>1</sup>H NMR of product 1c

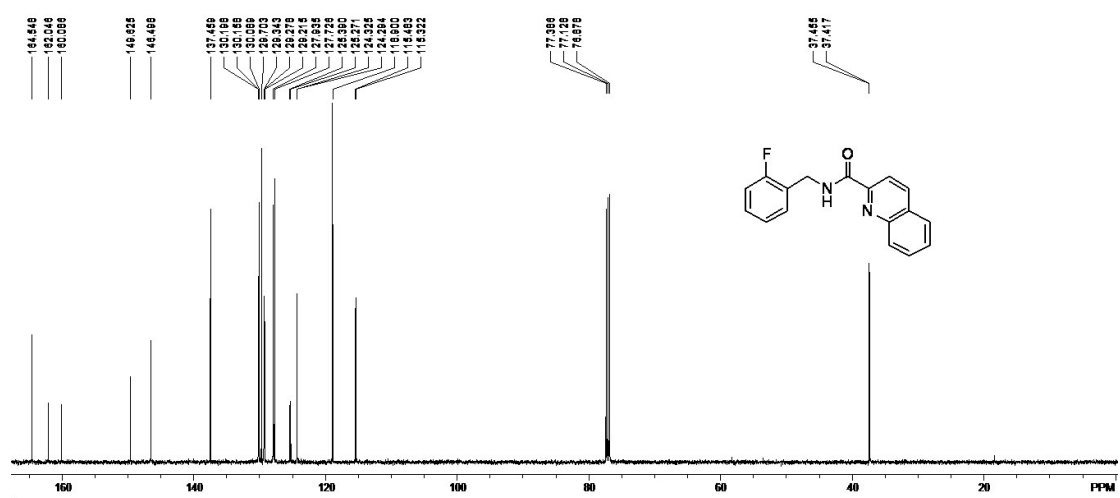

<sup>13</sup>C NMR of product 1c

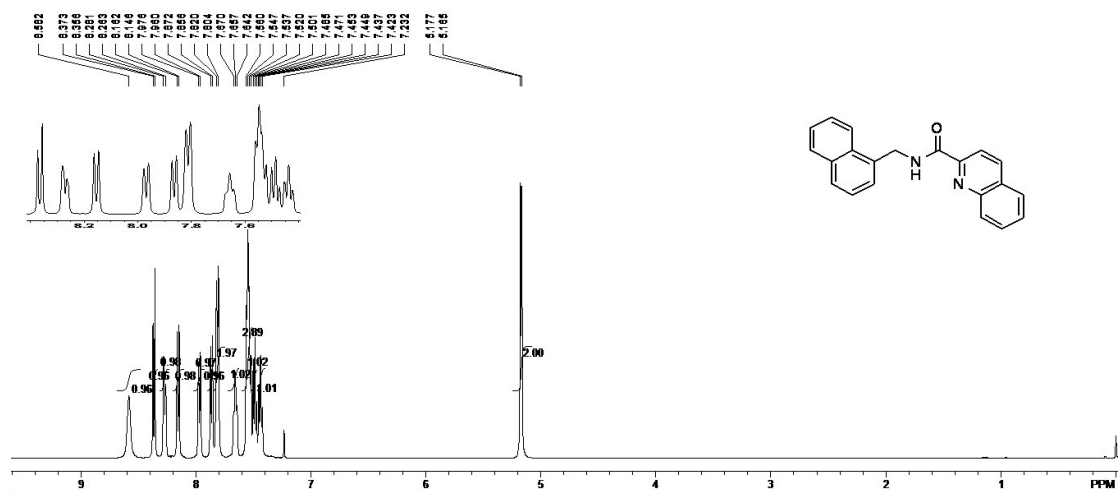

<sup>1</sup>H NMR of product **1d**

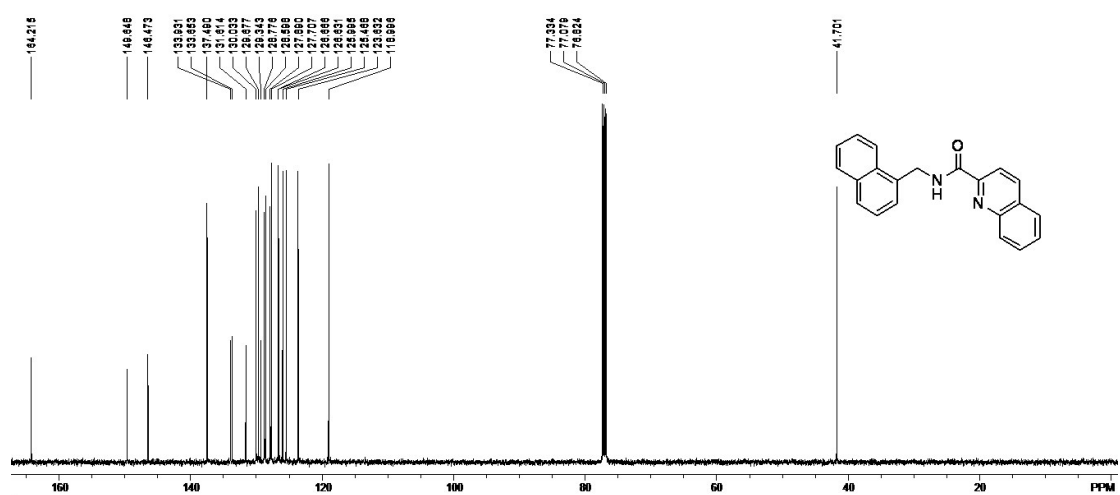

<sup>13</sup>C NMR of product **1d**

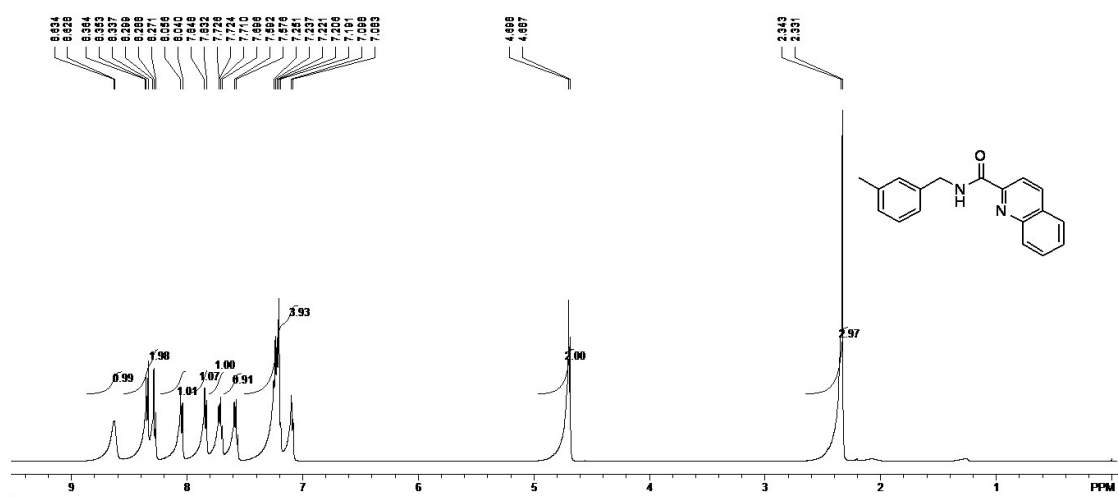

$^1\text{H}$  NMR of product 1e

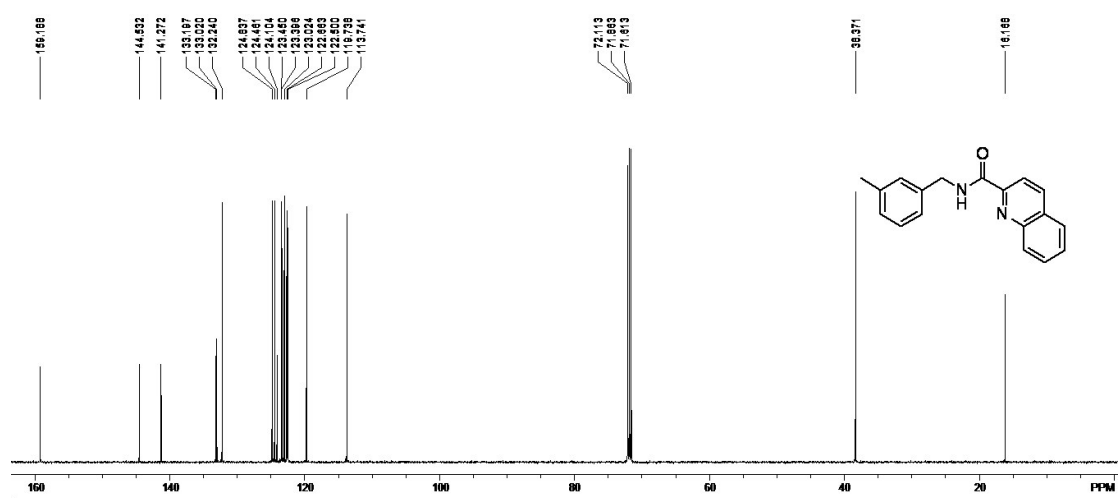

$^{13}\text{C}$  NMR of product 1e

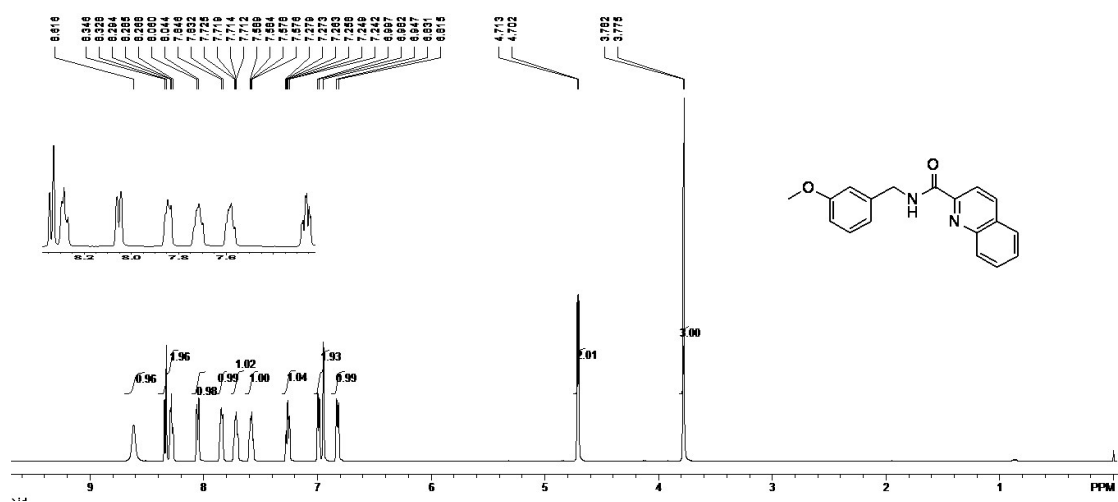

<sup>1</sup>H NMR of product **1f**

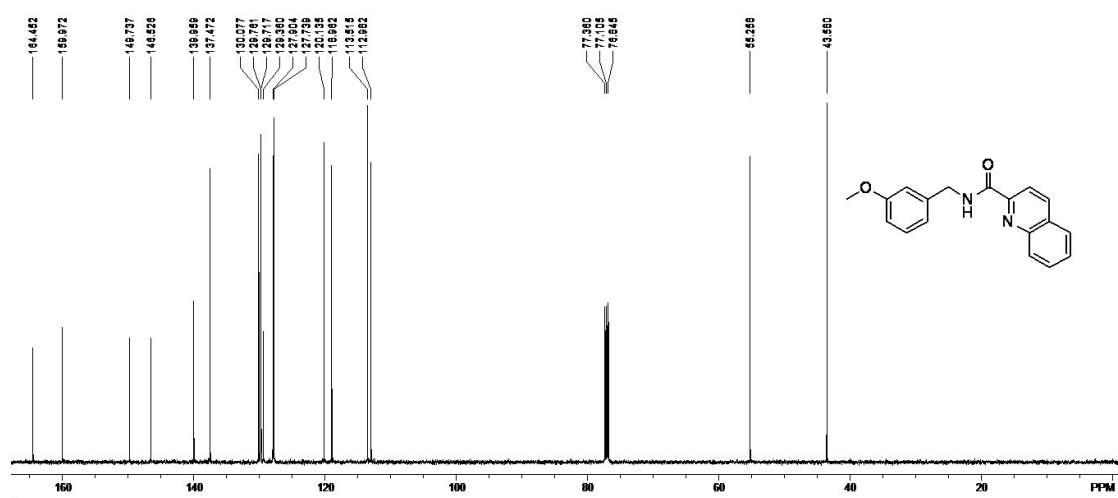

<sup>13</sup>C NMR of product **1f**

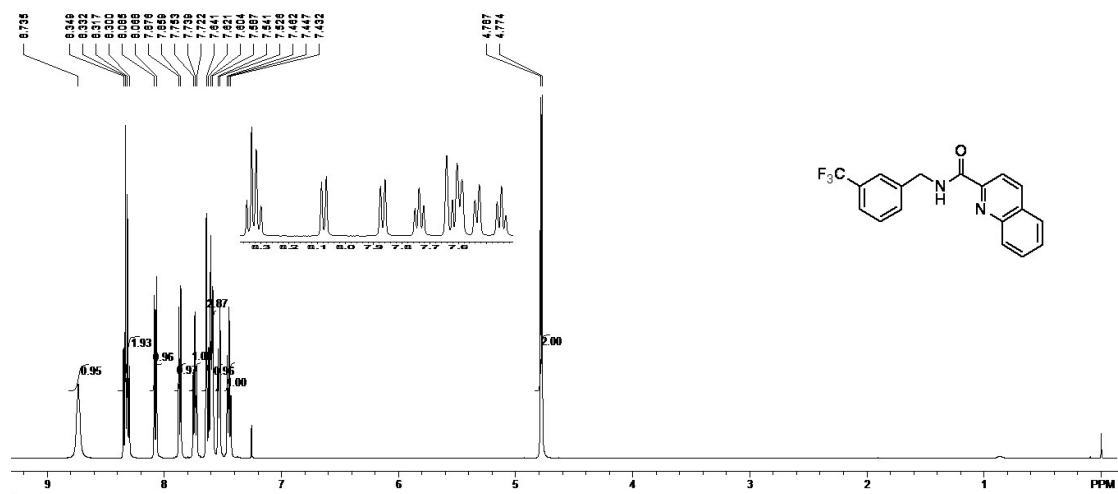

$^1\text{H}$  NMR of product **1g**

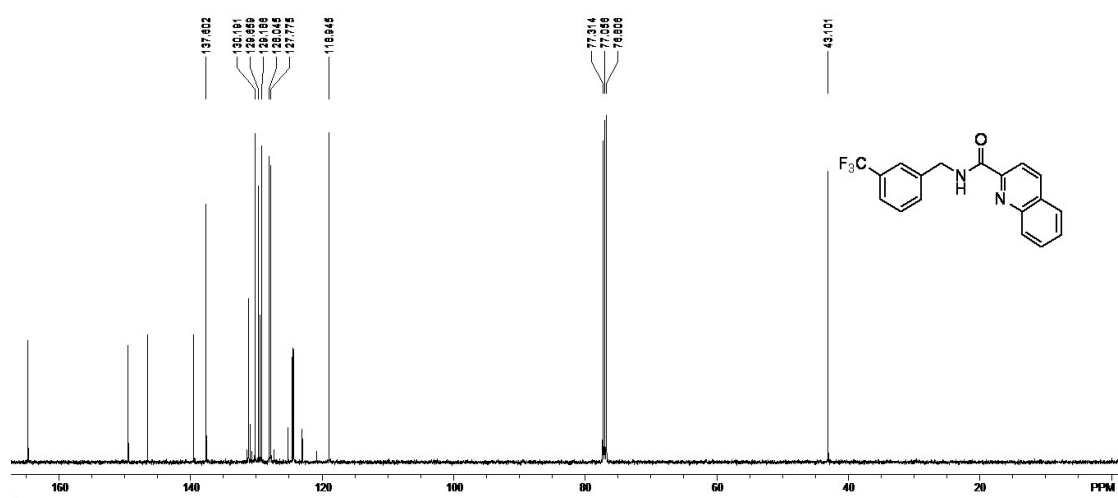

$^{13}\text{C}$  NMR of product **1g**

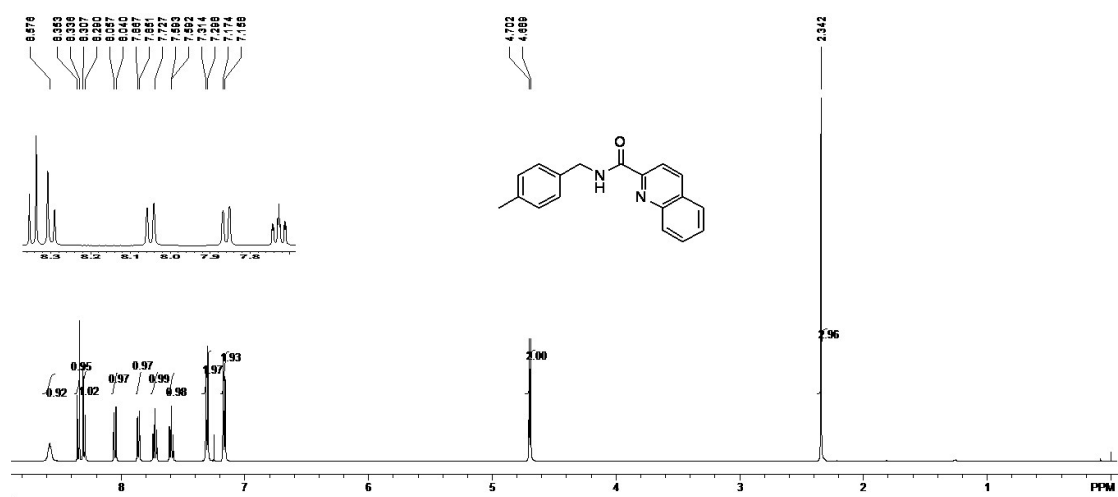

<sup>1</sup>H NMR of product **1h**

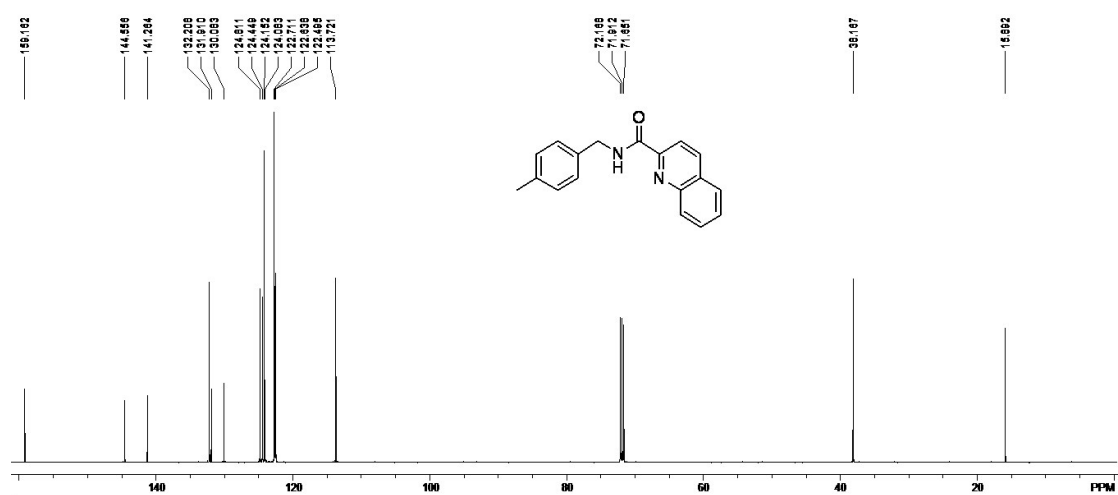

<sup>13</sup>C NMR of product **1h**

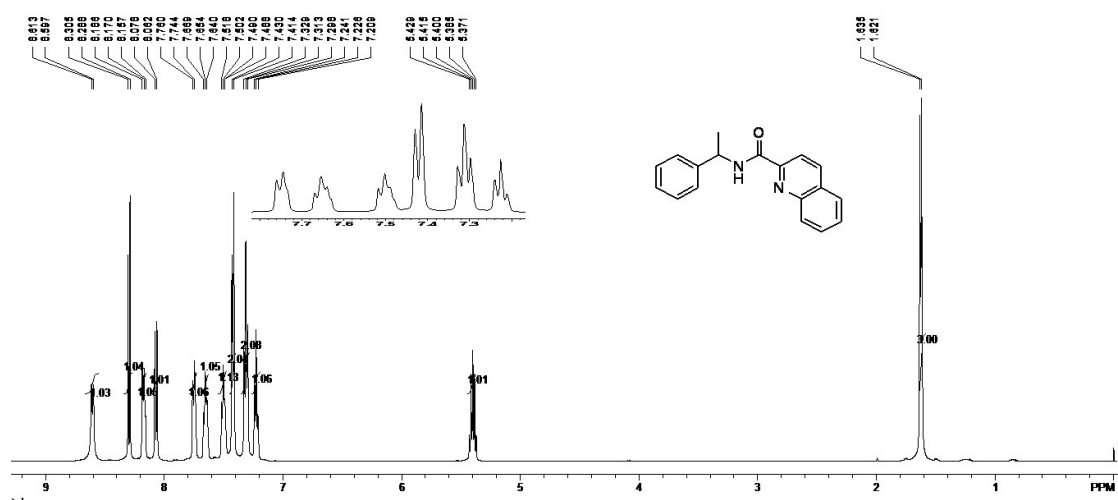

<sup>1</sup>H NMR of product **1i**

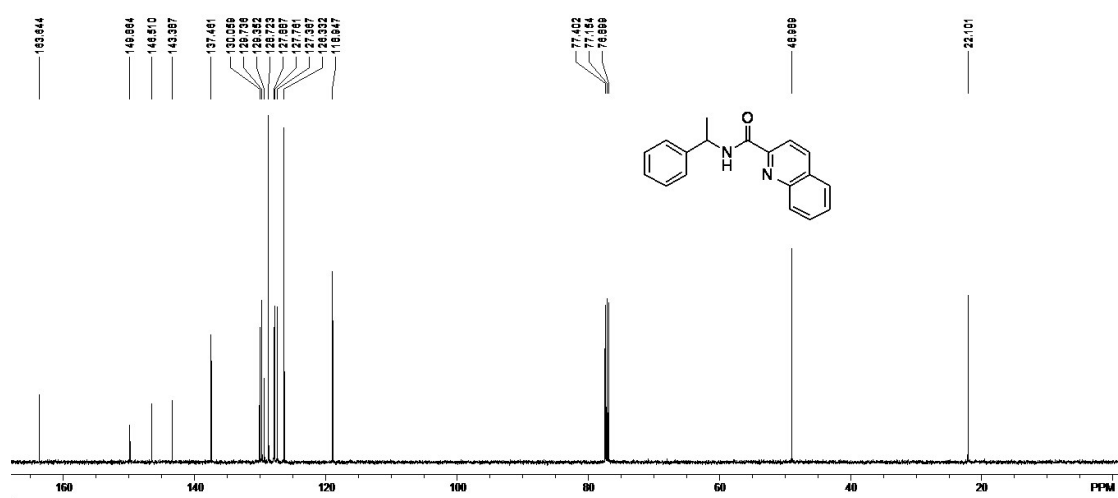

<sup>13</sup>C NMR of product **1i**

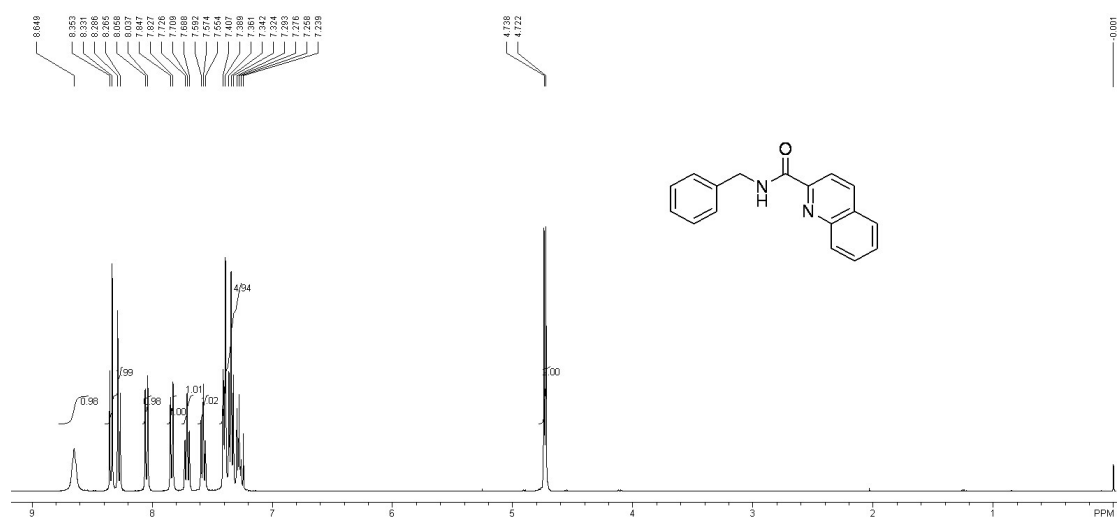

<sup>1</sup>H NMR of product **1j**

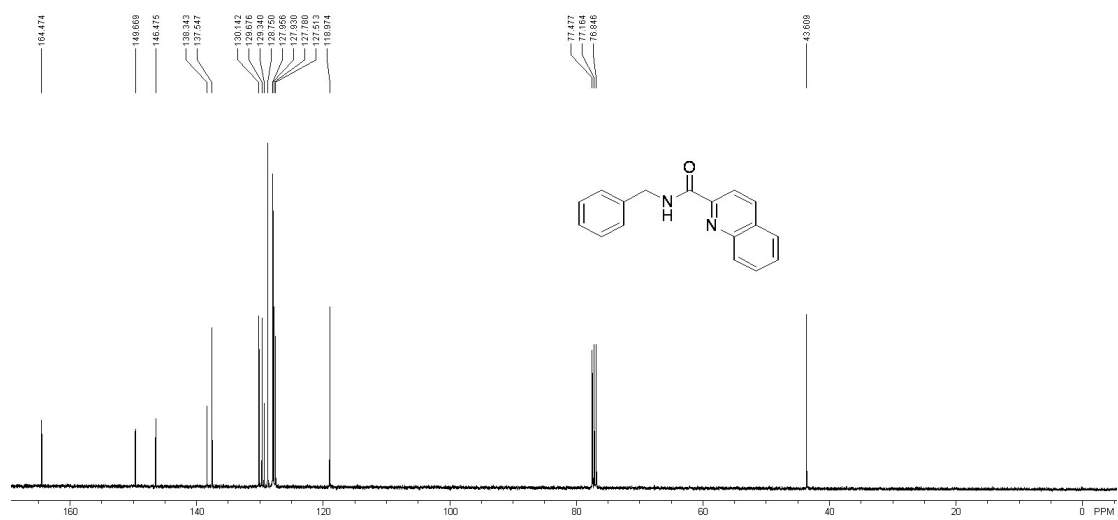

<sup>13</sup>C NMR of product **1j**



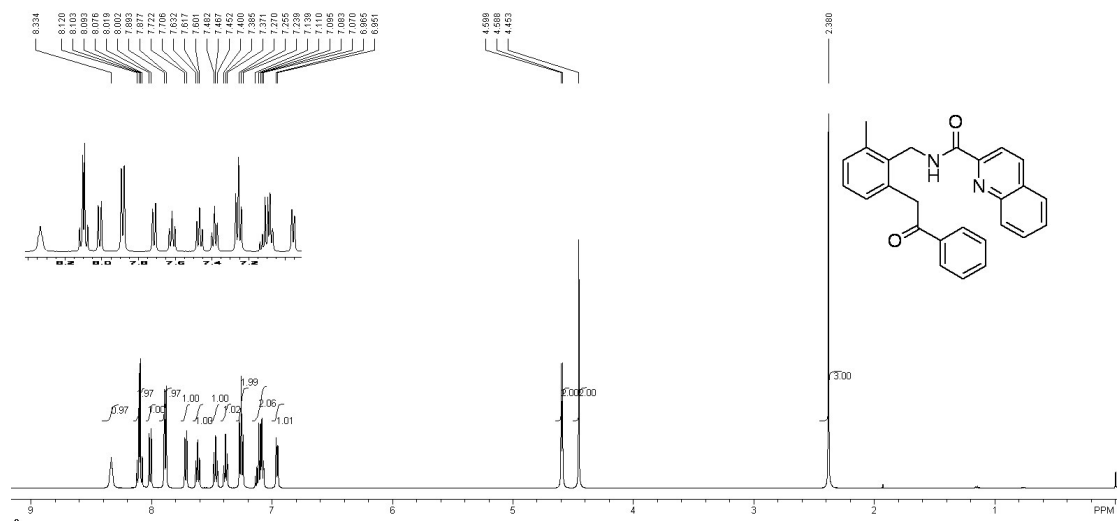

<sup>1</sup>H NMR of product 3a

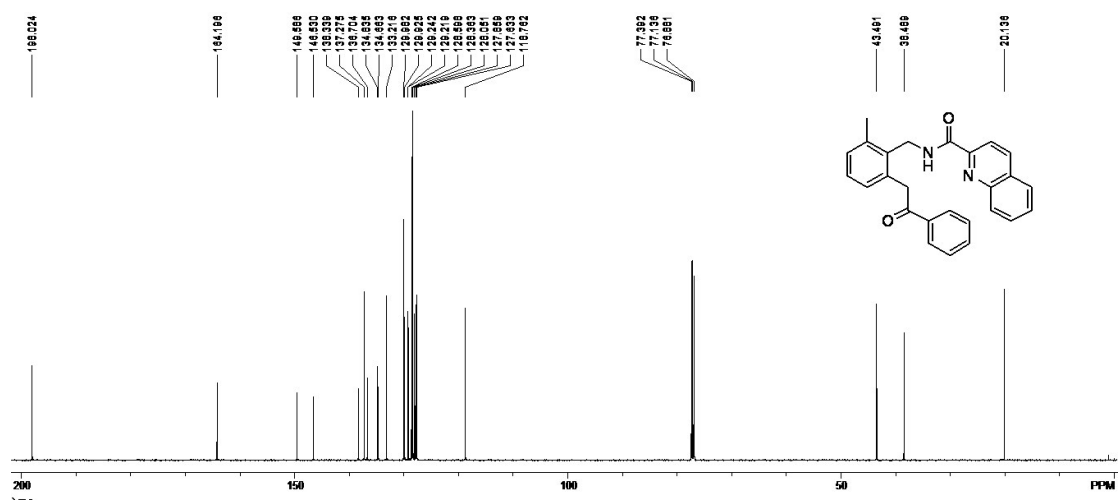

<sup>13</sup>C NMR of product 3a

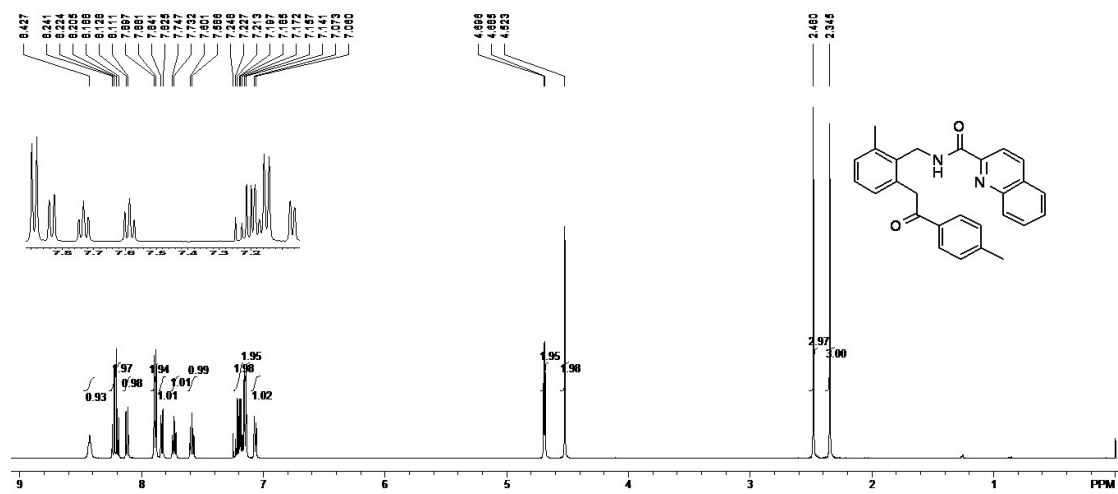

<sup>1</sup>H NMR of product **3b**

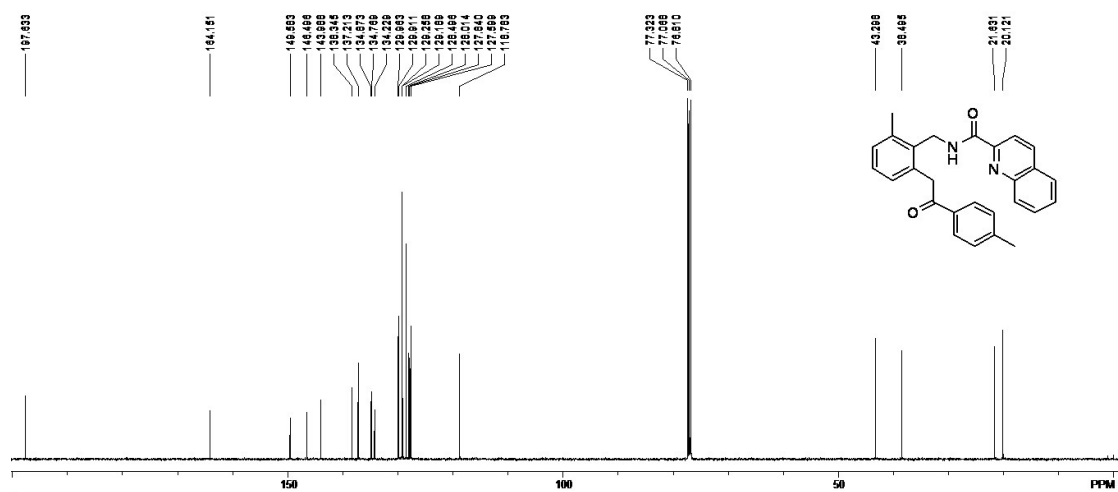

<sup>13</sup>C NMR of product **3b**

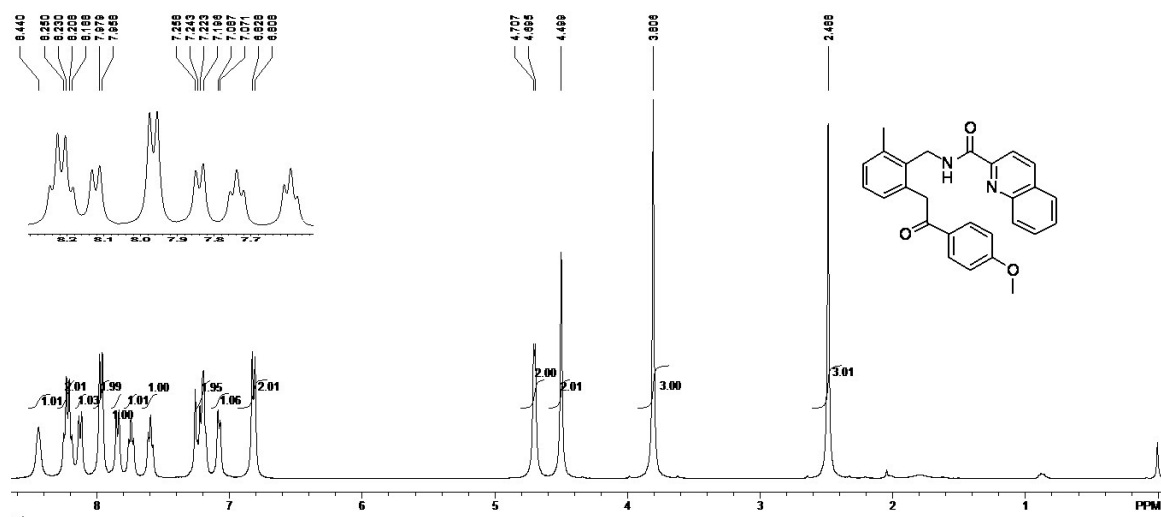

<sup>1</sup>H NMR of product 3c

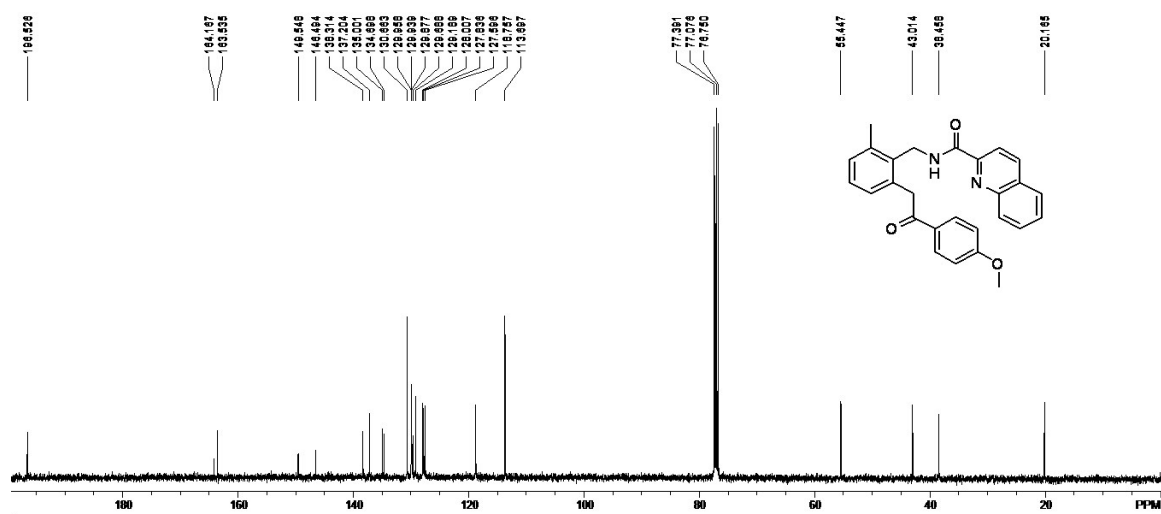

<sup>13</sup>C NMR of product 3c

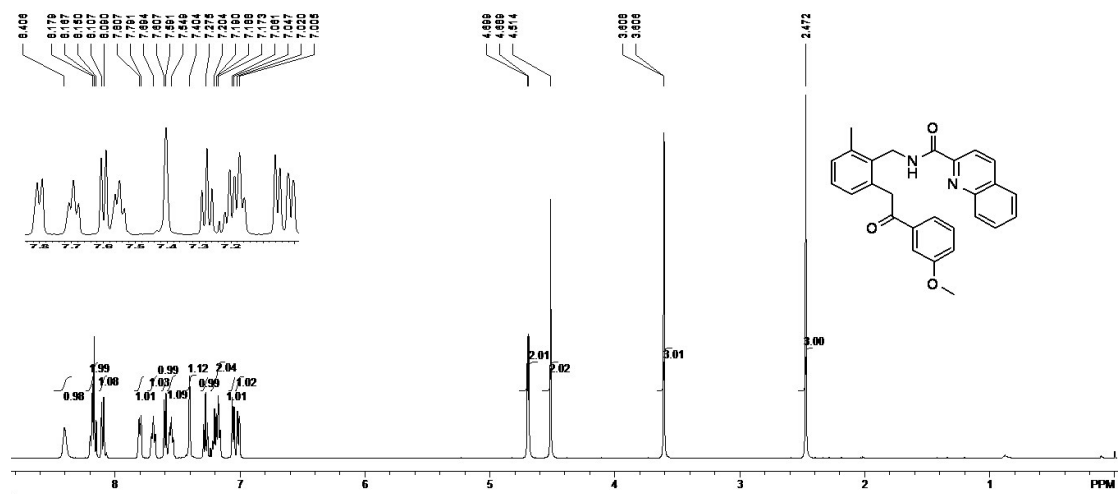

**<sup>1</sup>H NMR of product 3d**

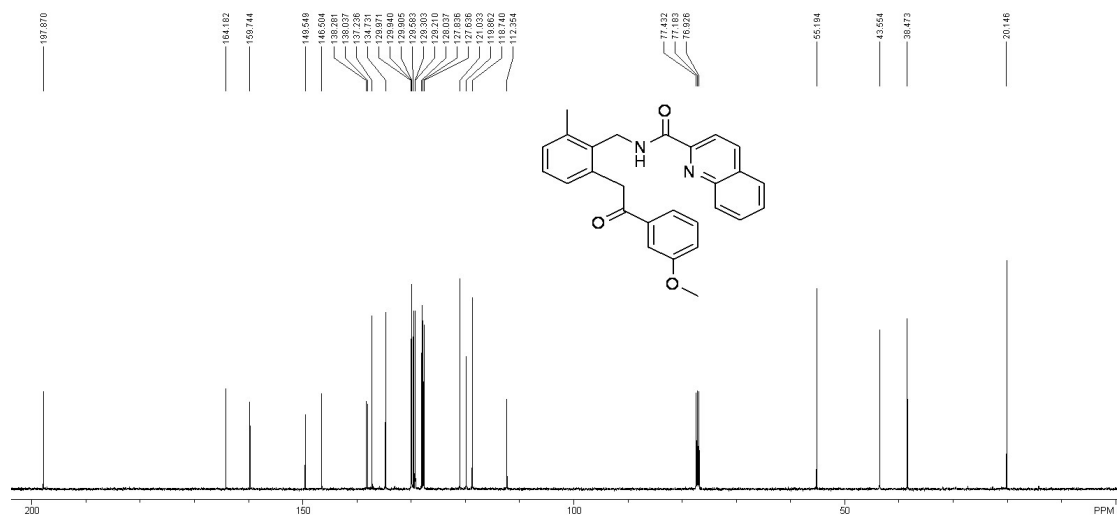

**<sup>13</sup>C NMR of product 3d**

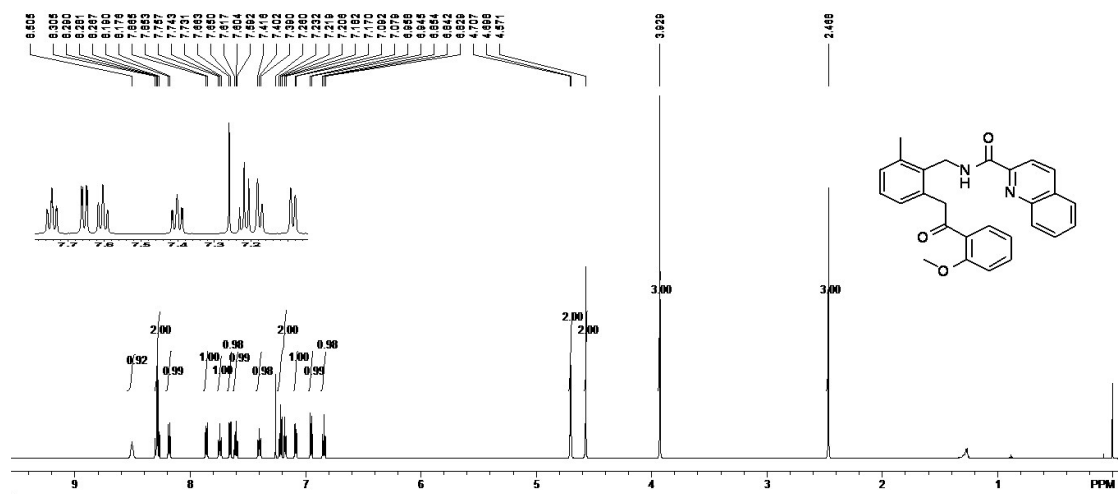

$^1\text{H}$  NMR of product 3e

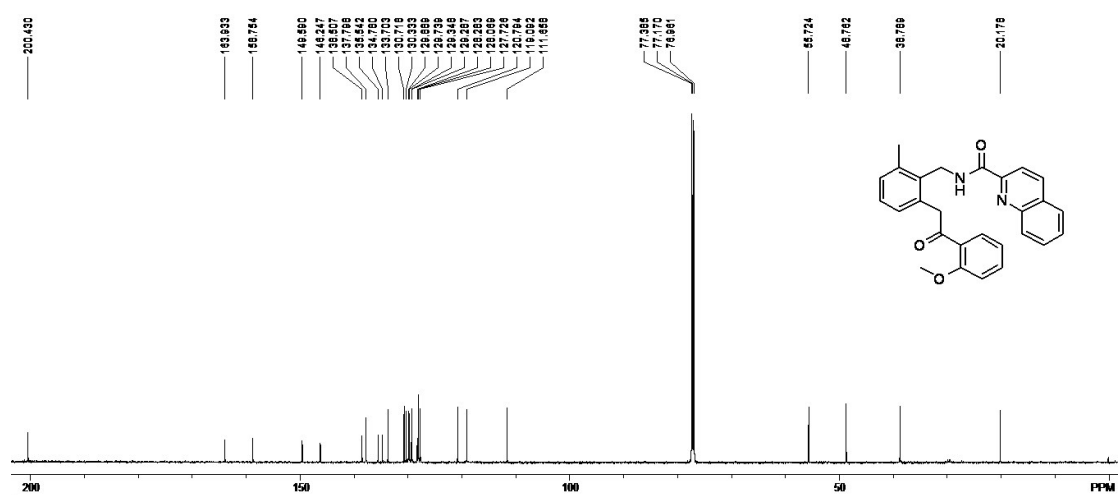

$^{13}\text{C}$  NMR of product 3e

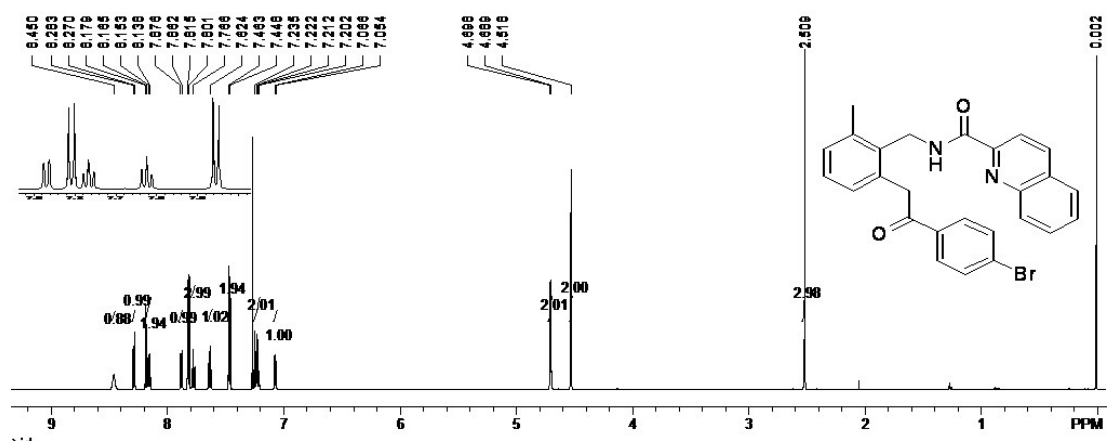

<sup>1</sup>H NMR of product **3f**

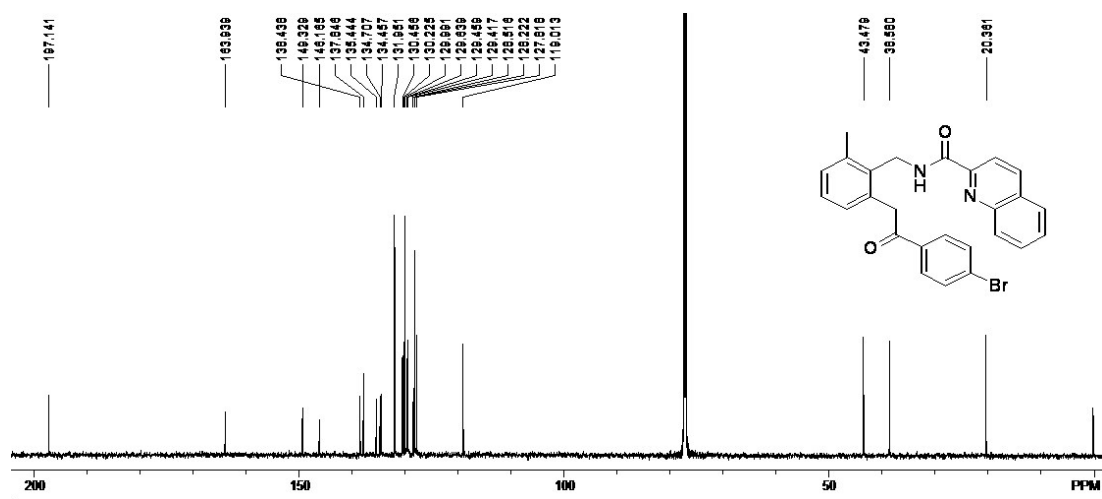

<sup>13</sup>C NMR of product **3f**

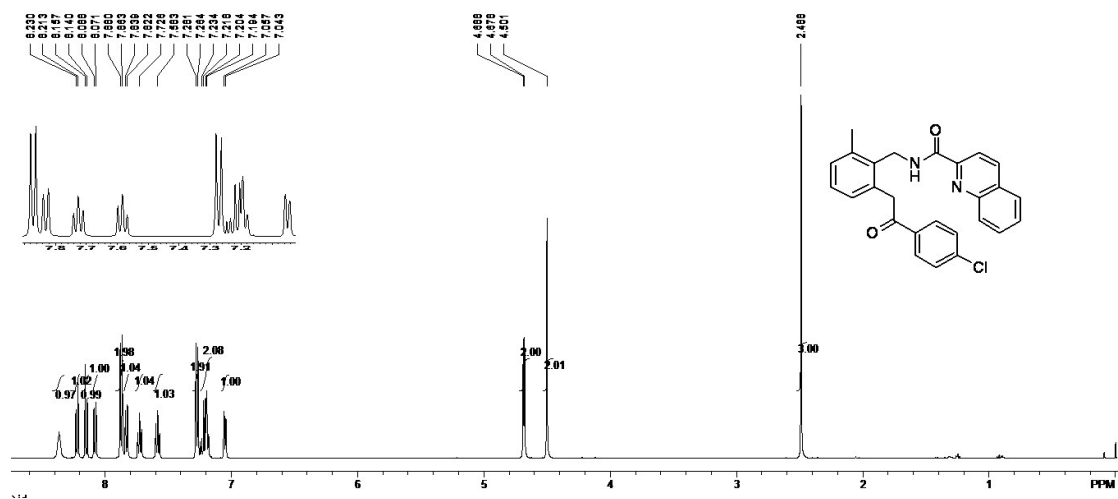

<sup>1</sup>H NMR of product 3g

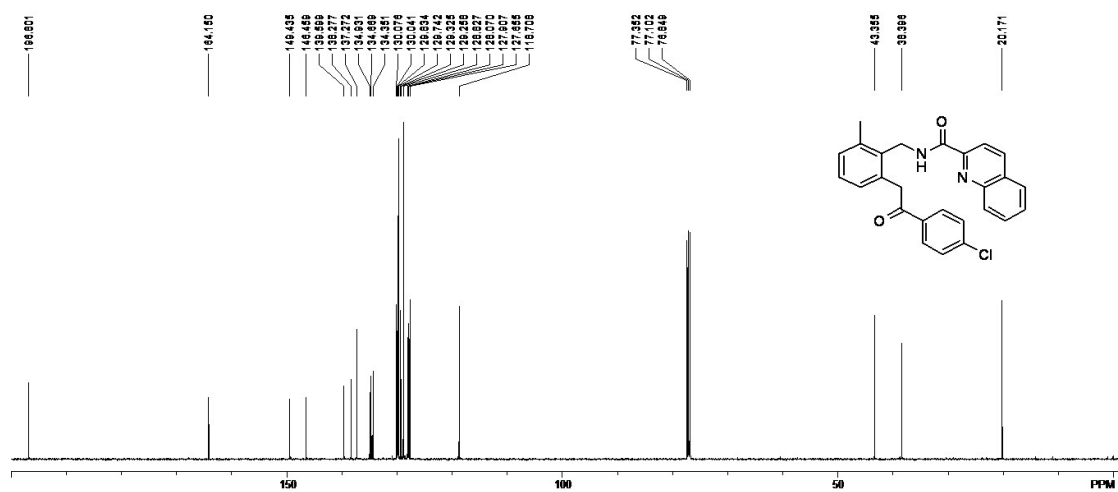

<sup>13</sup>C NMR of product 3g

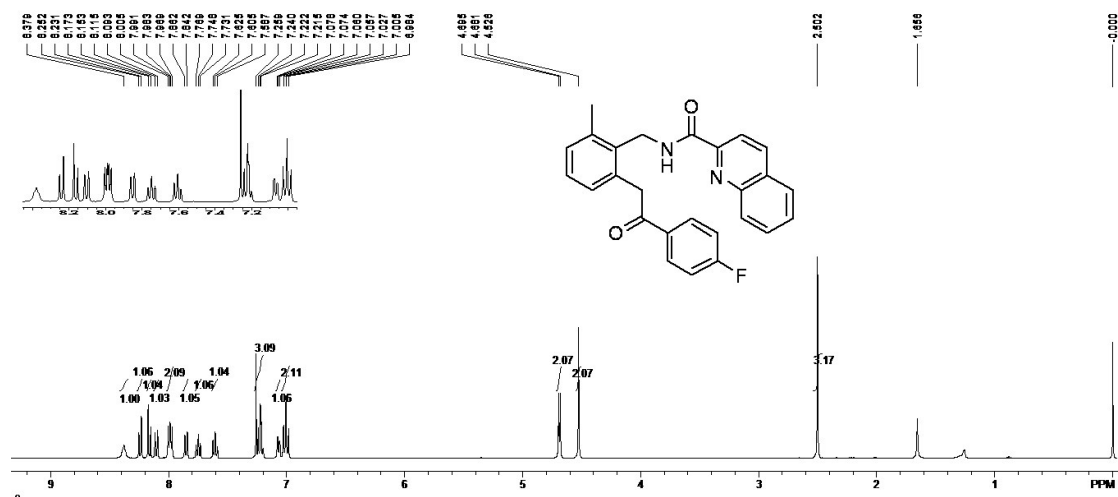

**<sup>1</sup>H NMR of product 3h**

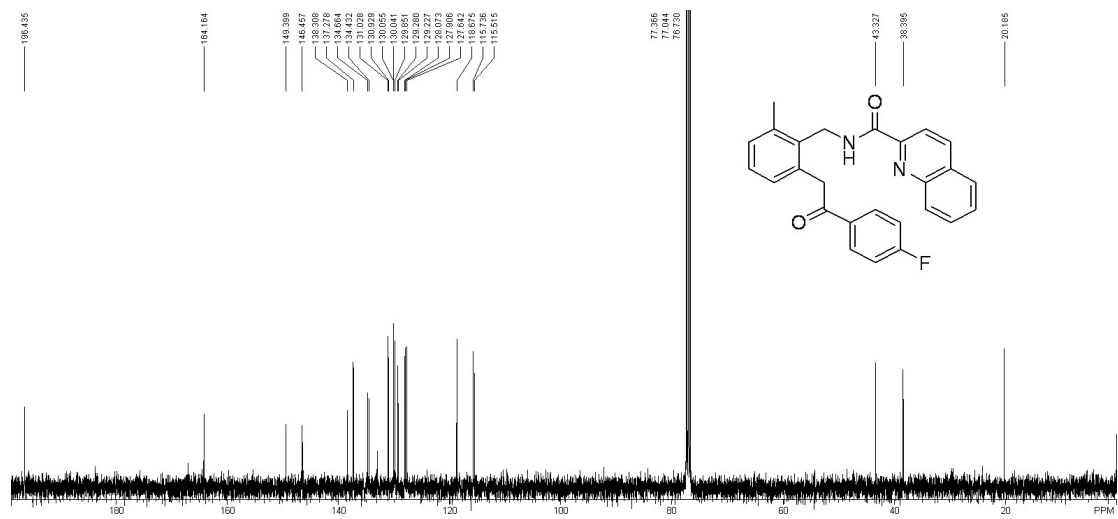

**<sup>13</sup>C NMR of product 3h**





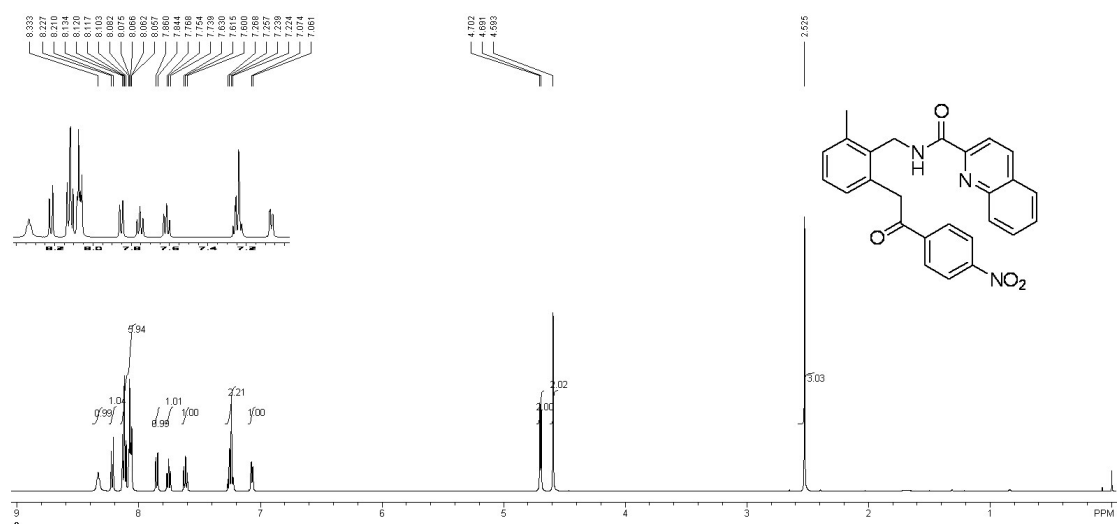

$^1\text{H NMR}$  of product **3j**

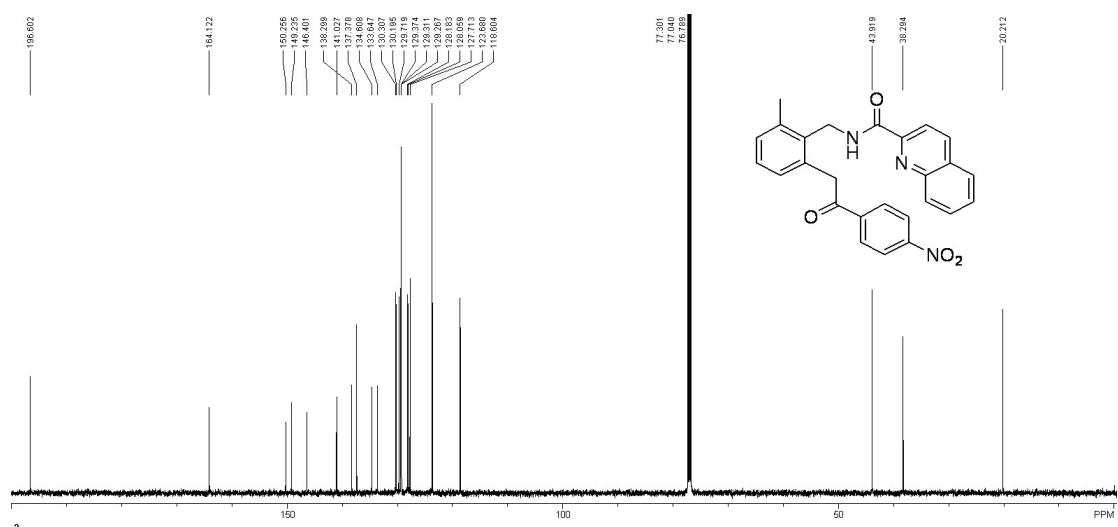

$^{13}\text{C NMR}$  of product **3j**

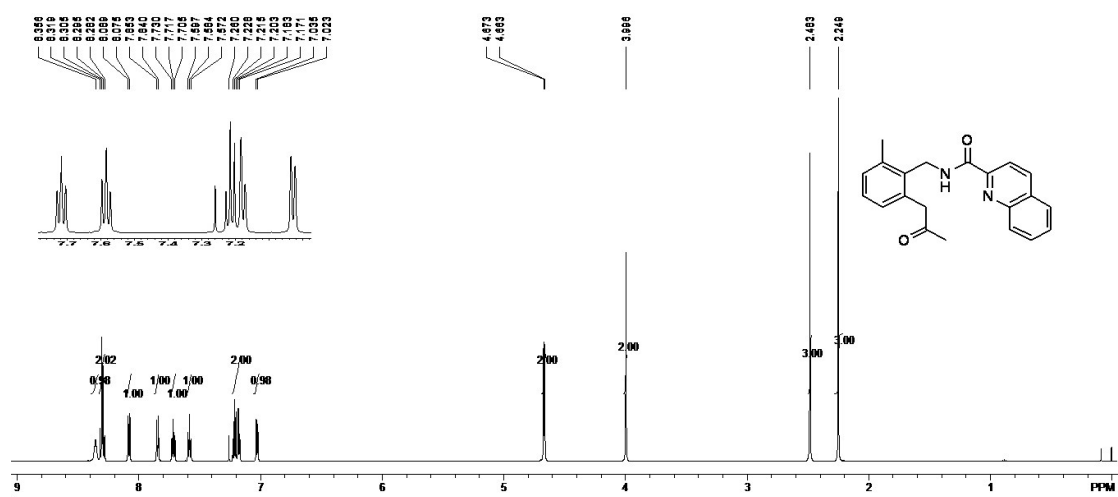

<sup>1</sup>H NMR of product **3k**

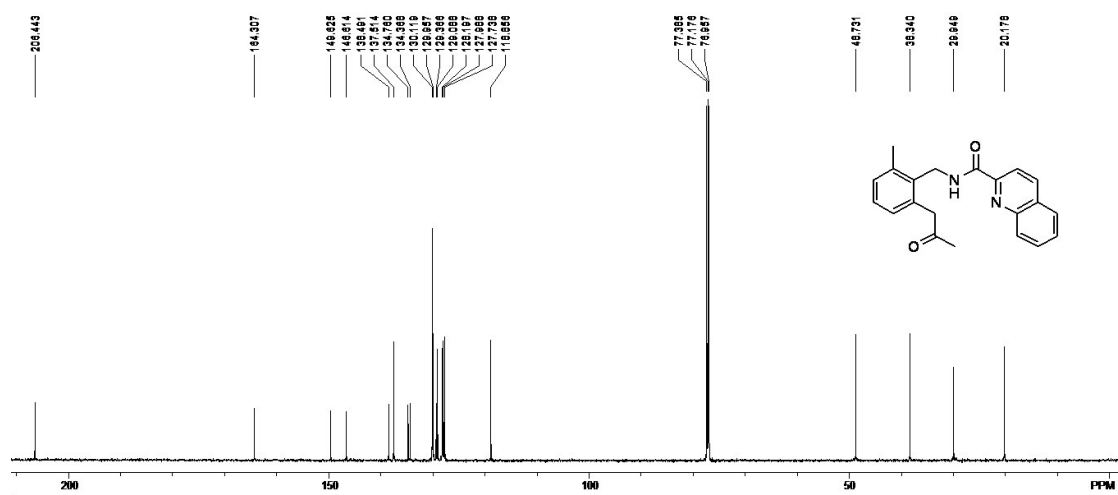

<sup>13</sup>C NMR of product **3k**

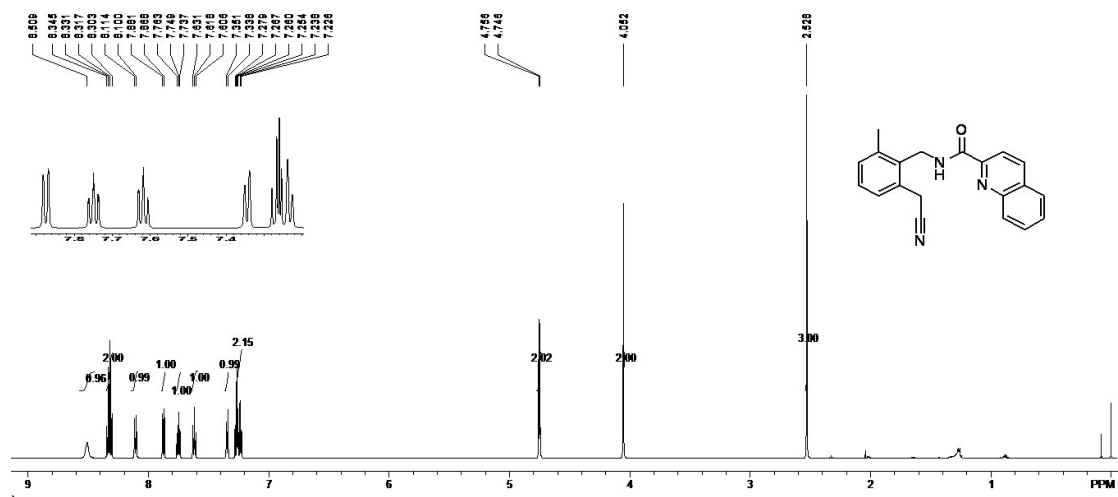

<sup>1</sup>H NMR of product 31

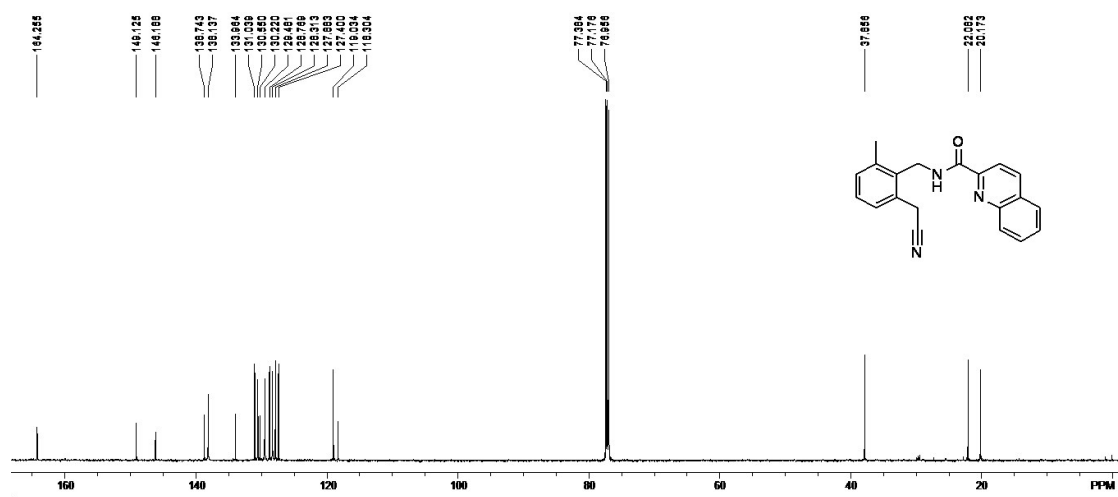

<sup>13</sup>C NMR of product 31

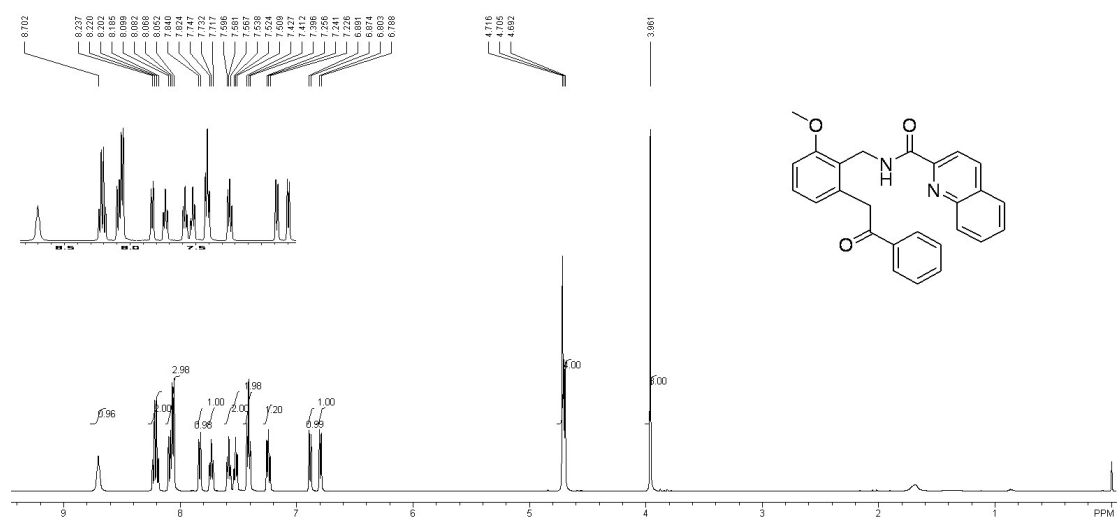

$^1\text{H}$  NMR of product **3m**

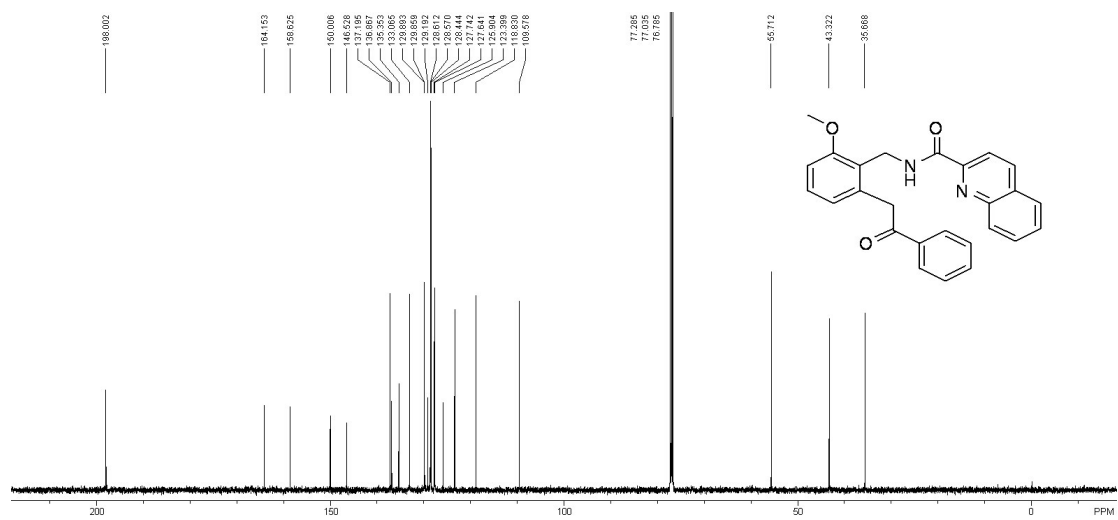

$^{13}\text{C}$  NMR of product **3m**

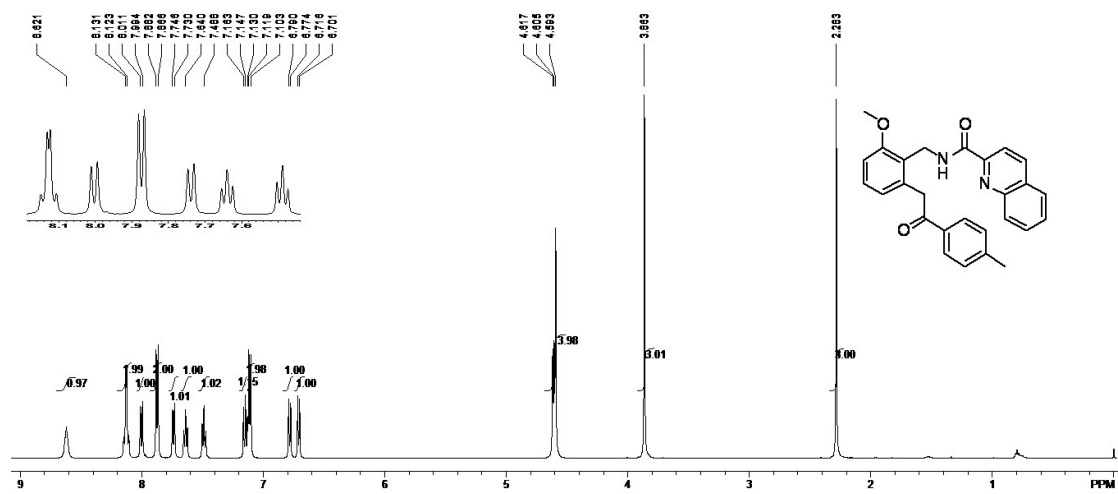

<sup>1</sup>H NMR of product 3n

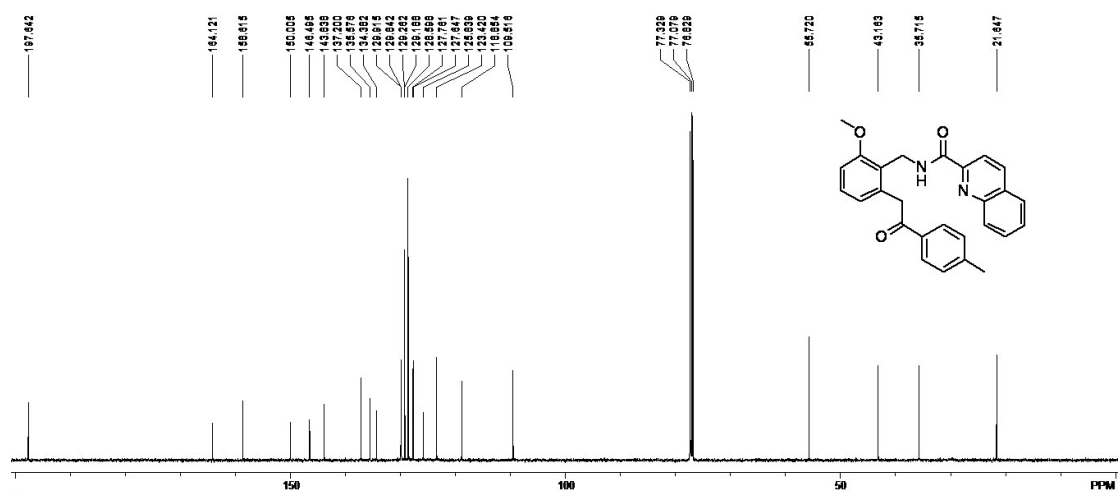

<sup>13</sup>C NMR of product 3n

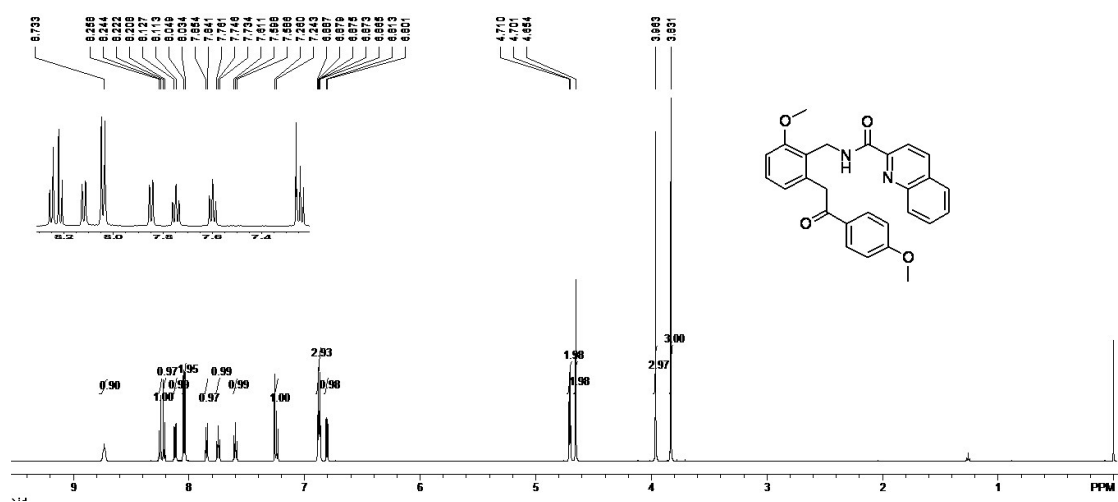

<sup>1</sup>H NMR of product 3o

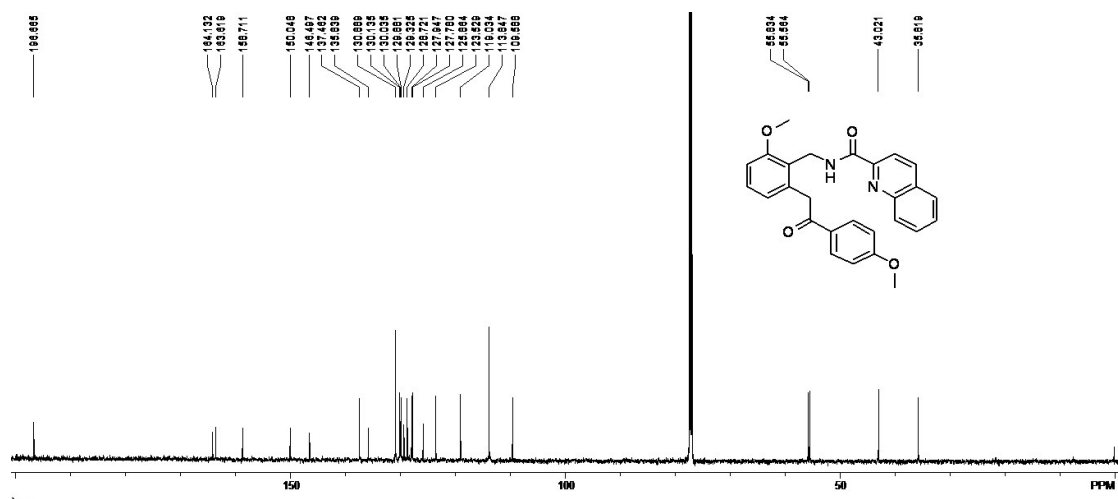

<sup>13</sup>C NMR of product 3o

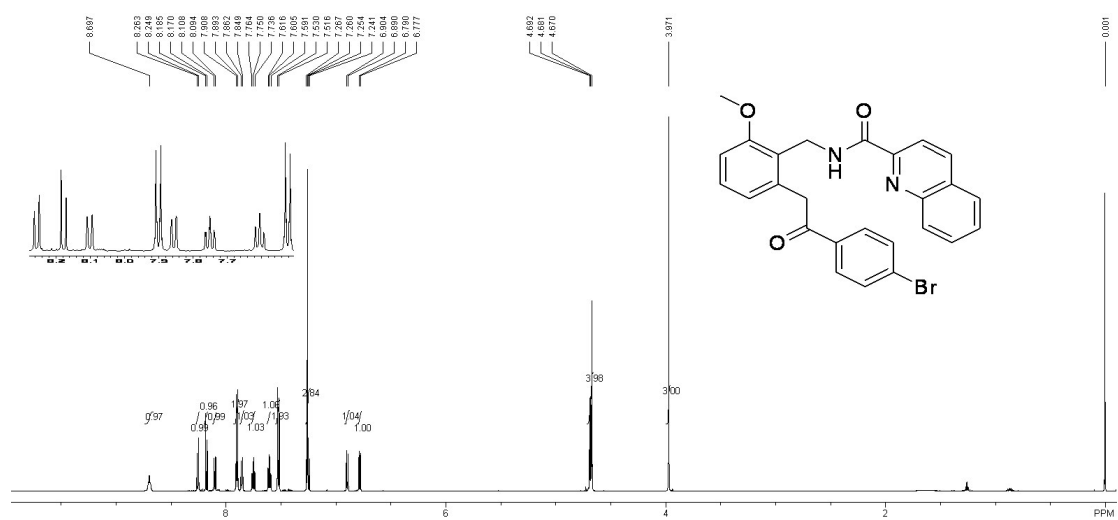

<sup>1</sup>H NMR of product 3p

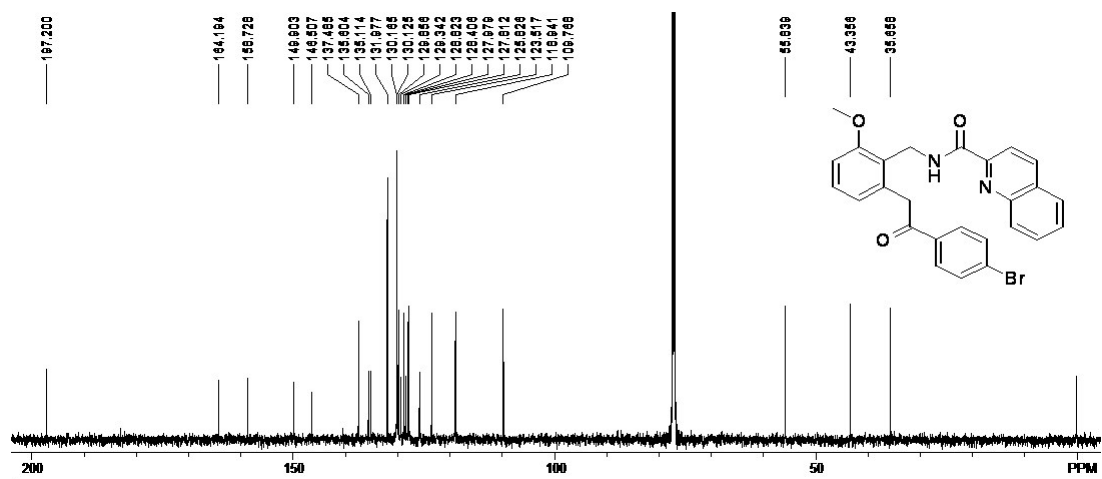

<sup>13</sup>C NMR of product 3p



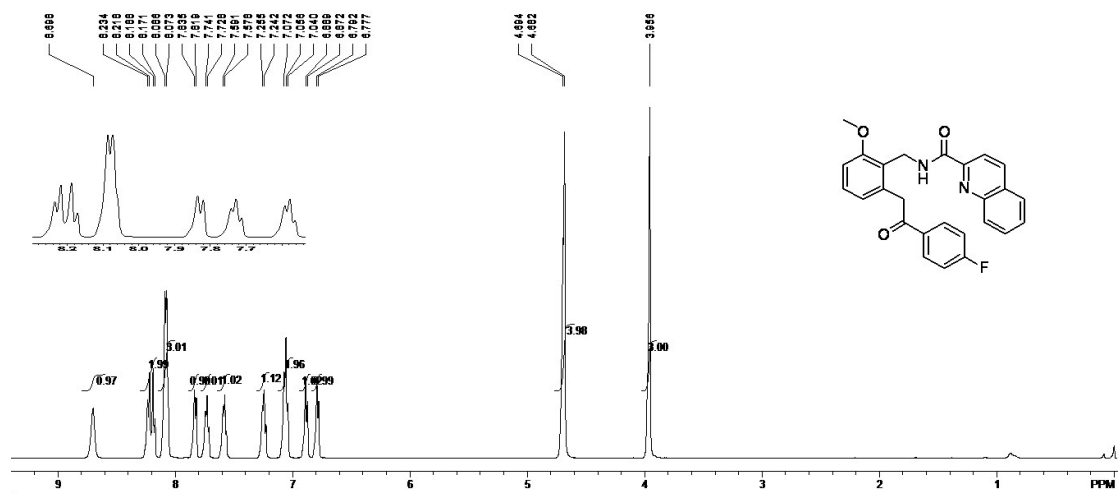

<sup>1</sup>H NMR of product 3q

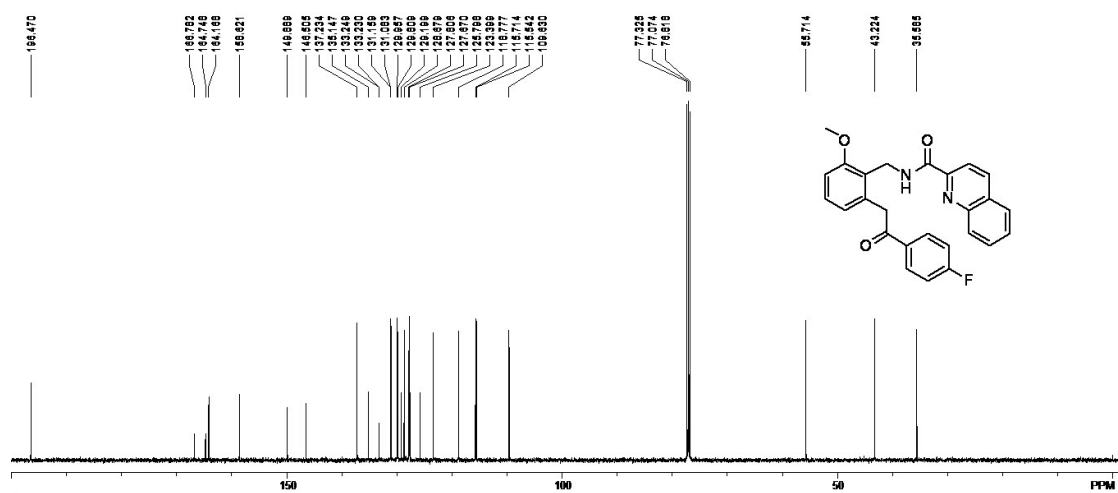

<sup>13</sup>C NMR of product 3q

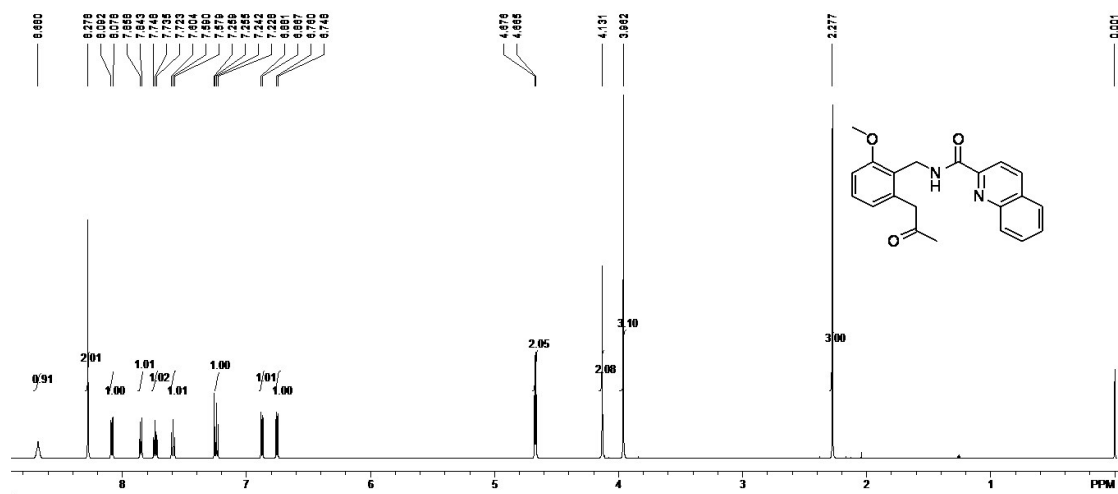

<sup>1</sup>H NMR of product 3r

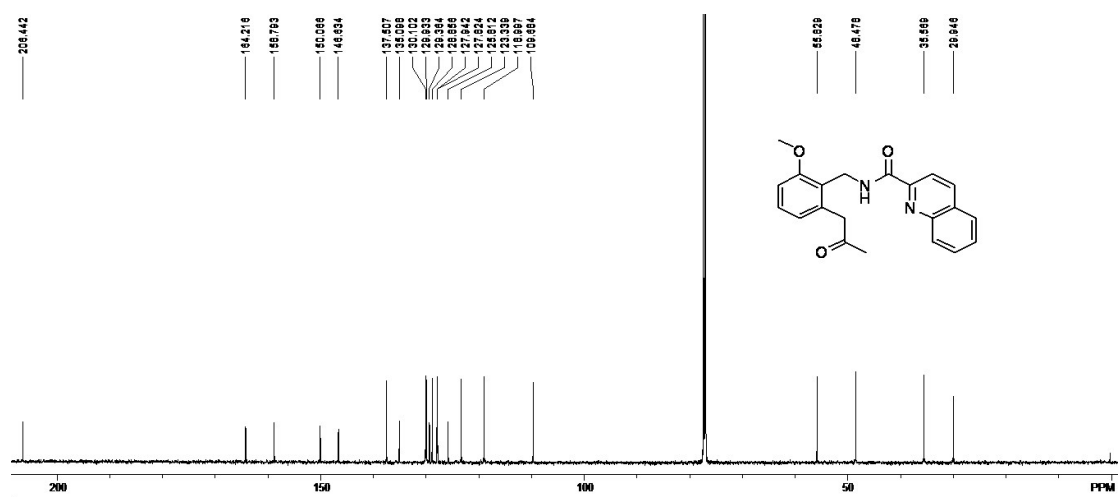

<sup>13</sup>C NMR of product 3r

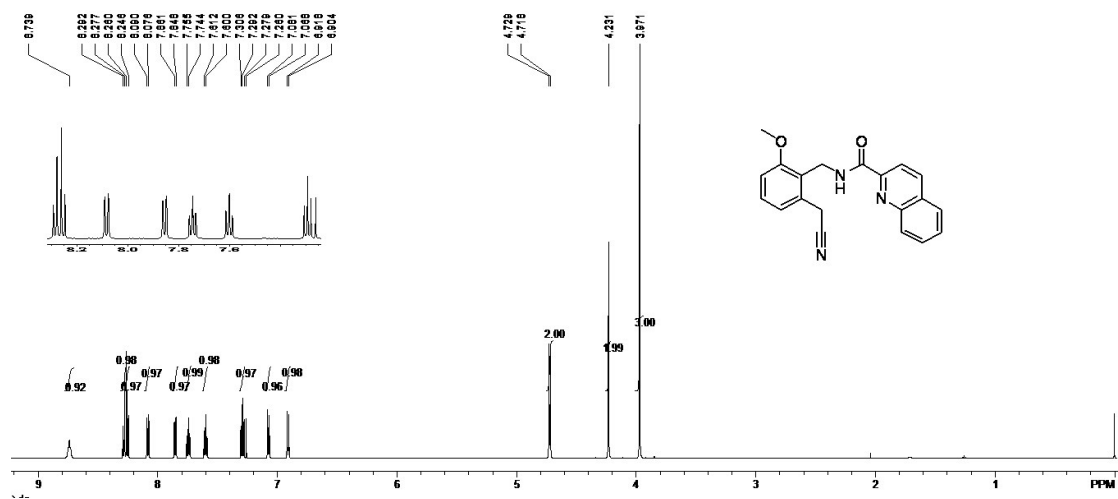

<sup>1</sup>H NMR of product 3s

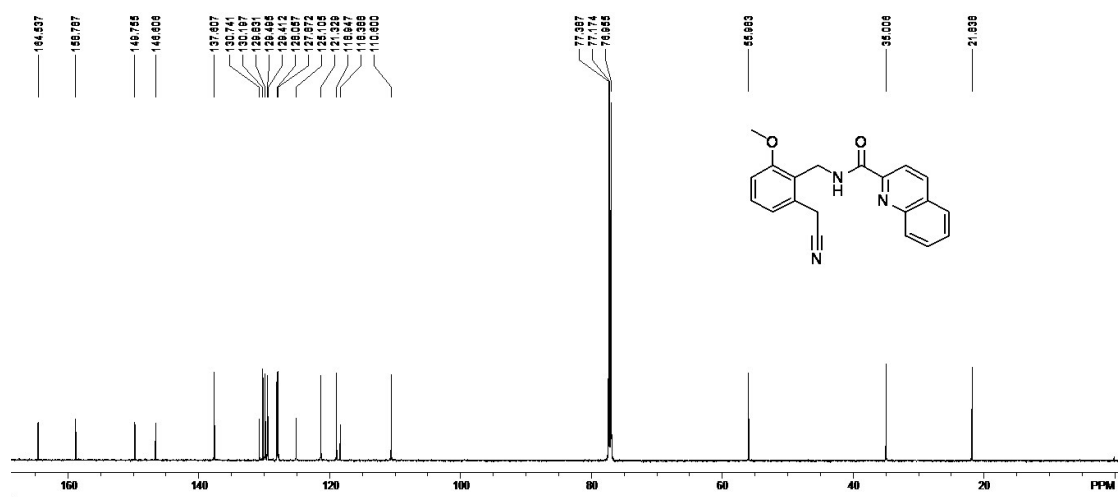

<sup>13</sup>C NMR of product 3s

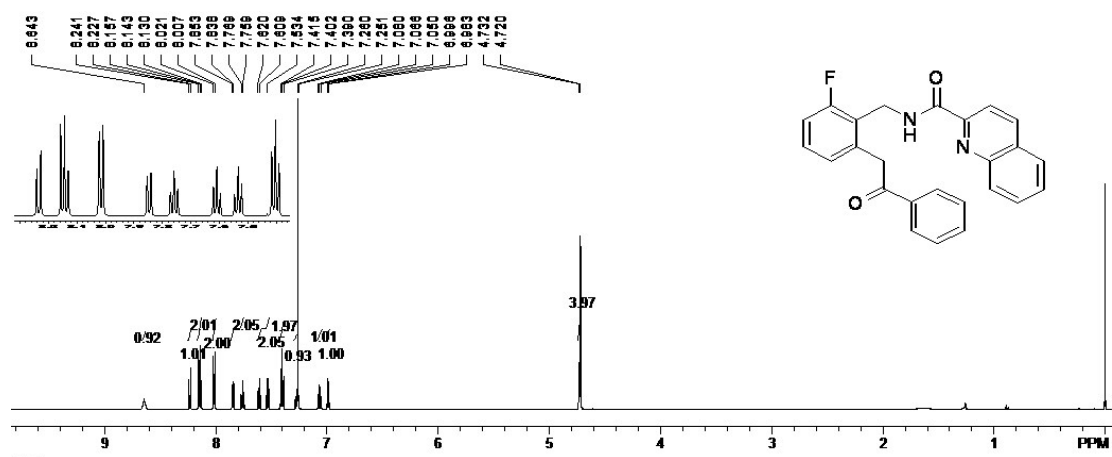

$^1\text{H NMR}$  of product **3t**

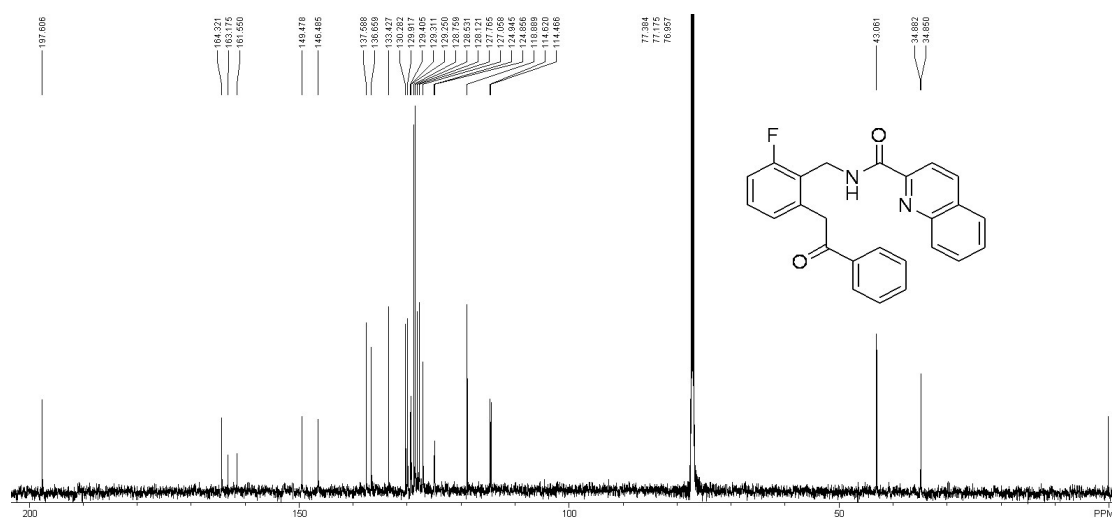

$^{13}\text{C NMR}$  of product **3t**

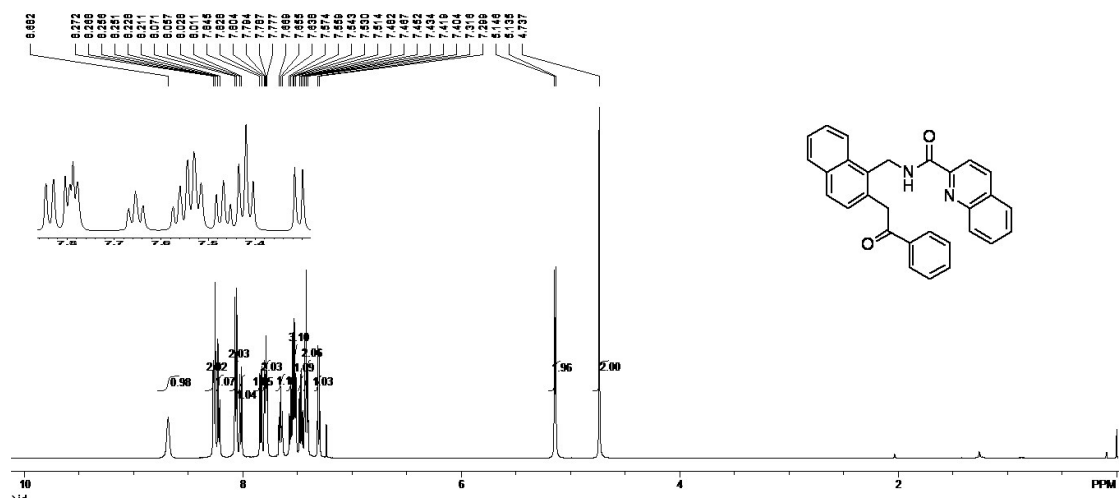

<sup>1</sup>H NMR of product **3u**

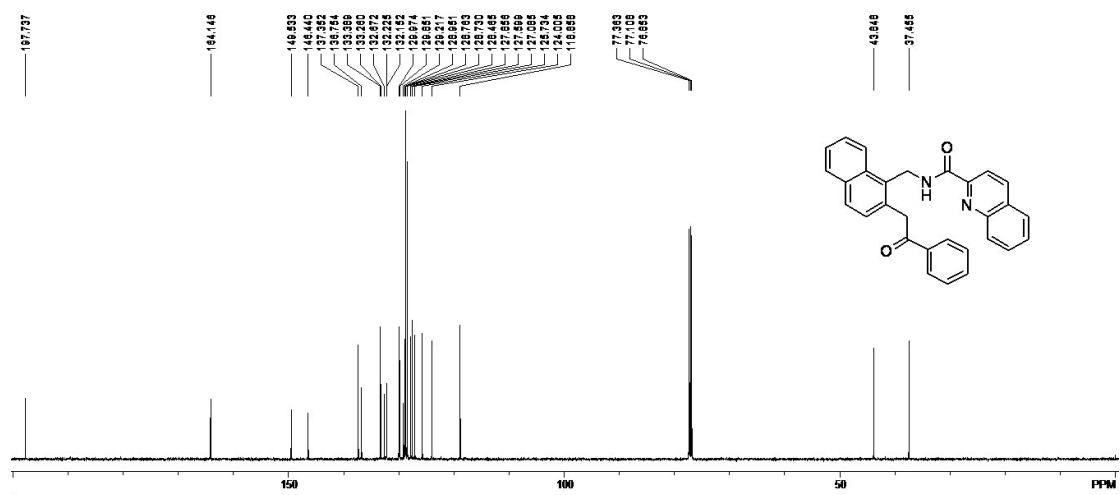

<sup>13</sup>C NMR of product **3u**

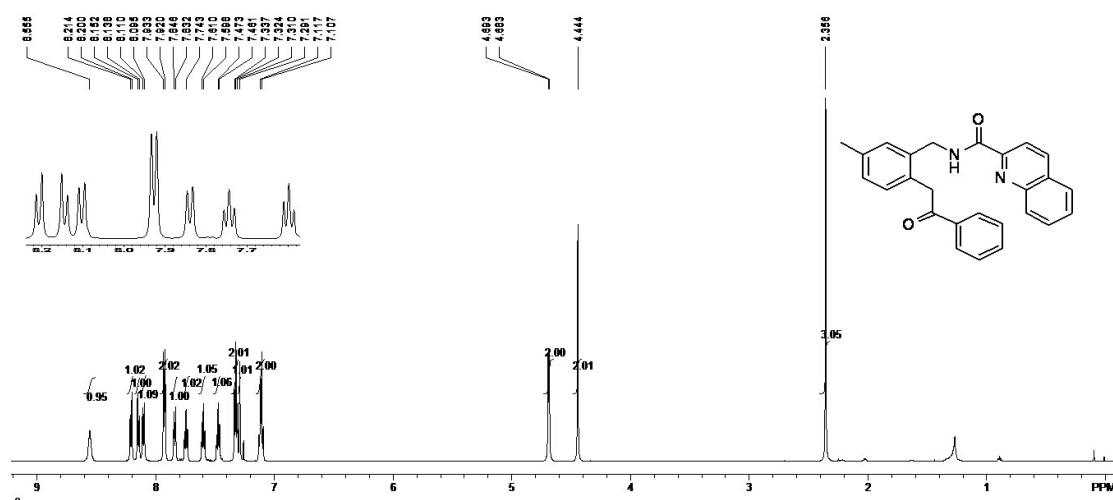

<sup>1</sup>H NMR of product 3v

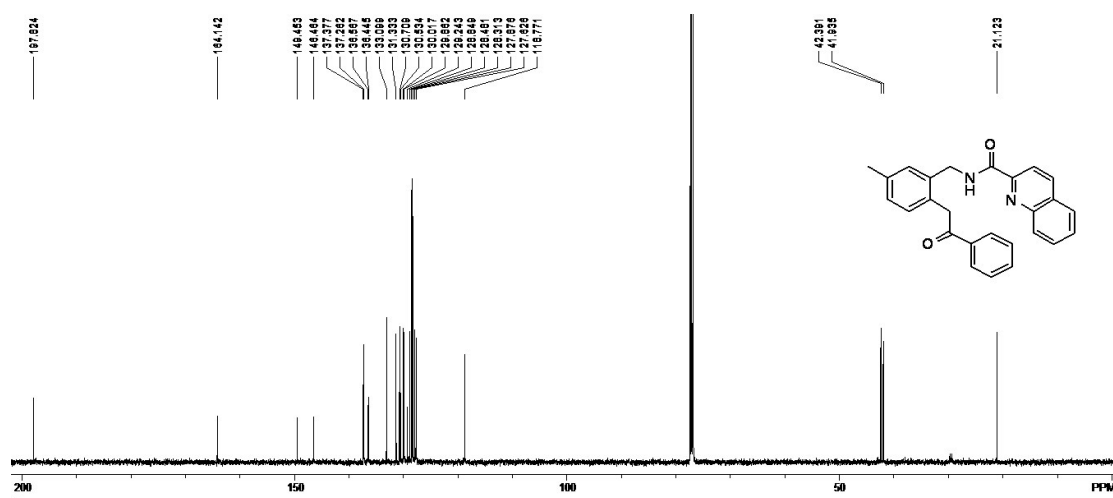

<sup>13</sup>C NMR of product 3v

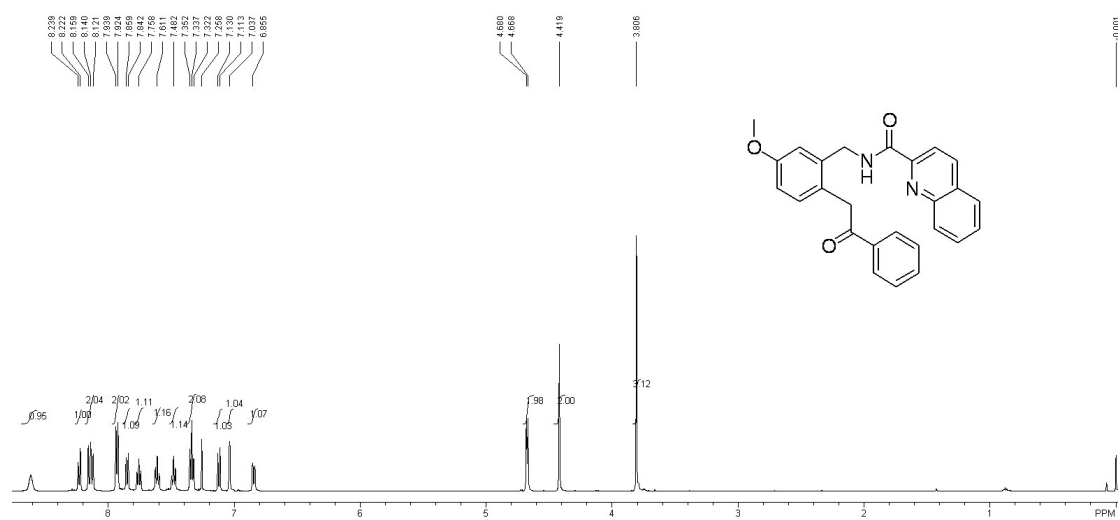

$^1\text{H}$  NMR of product **3w**

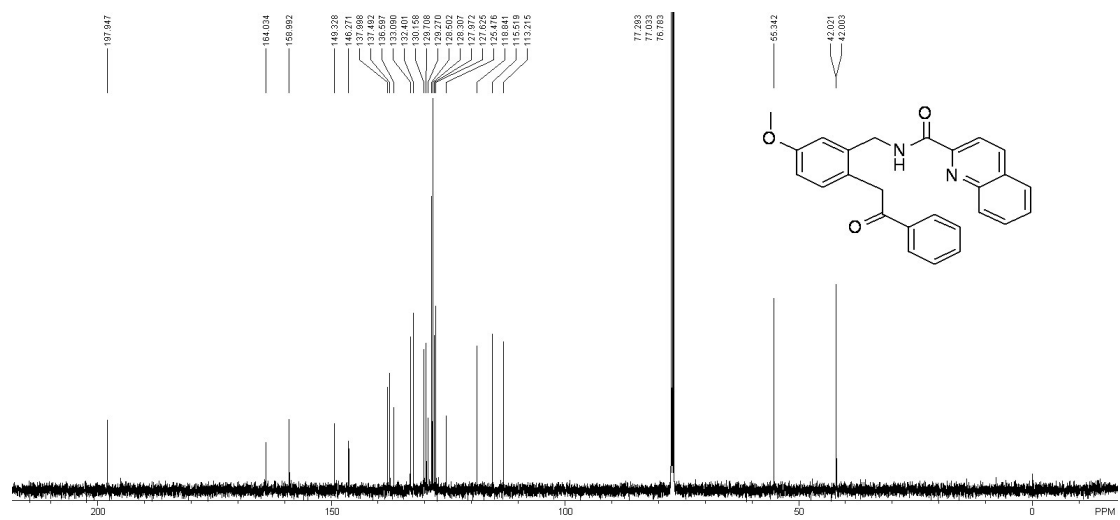

$^{13}\text{C}$  NMR of product **3w**

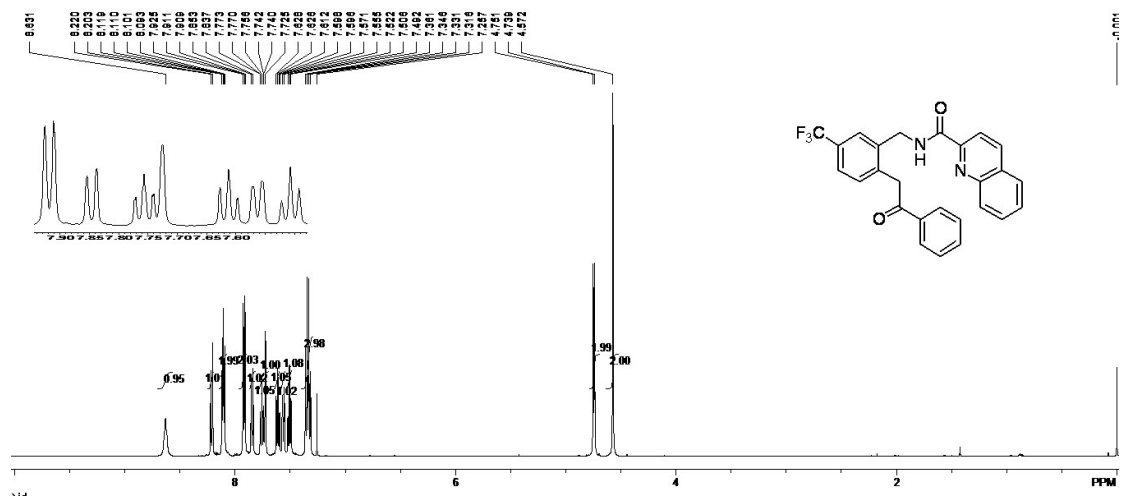

<sup>1</sup>H NMR of product 3x

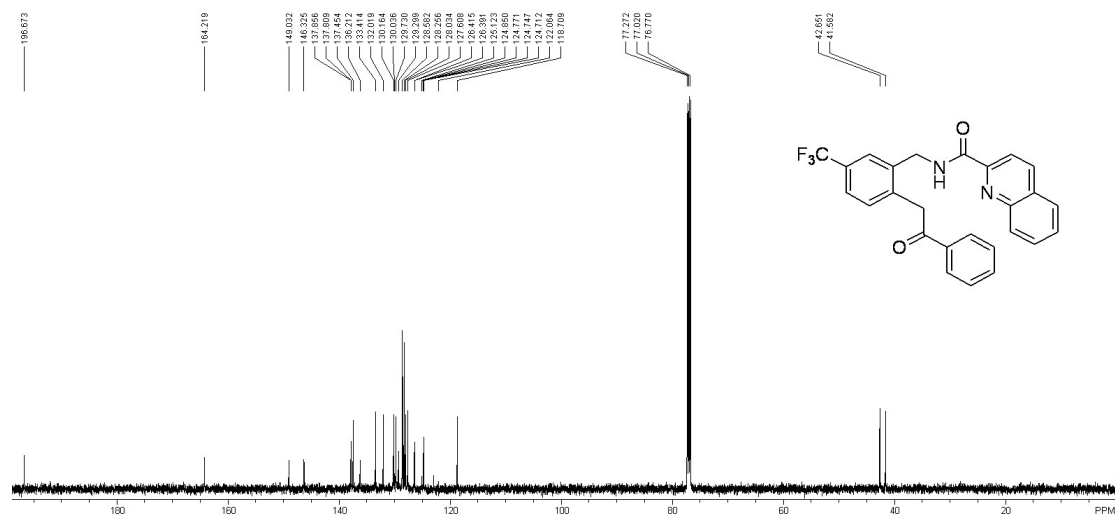

<sup>13</sup>C NMR of product 3x



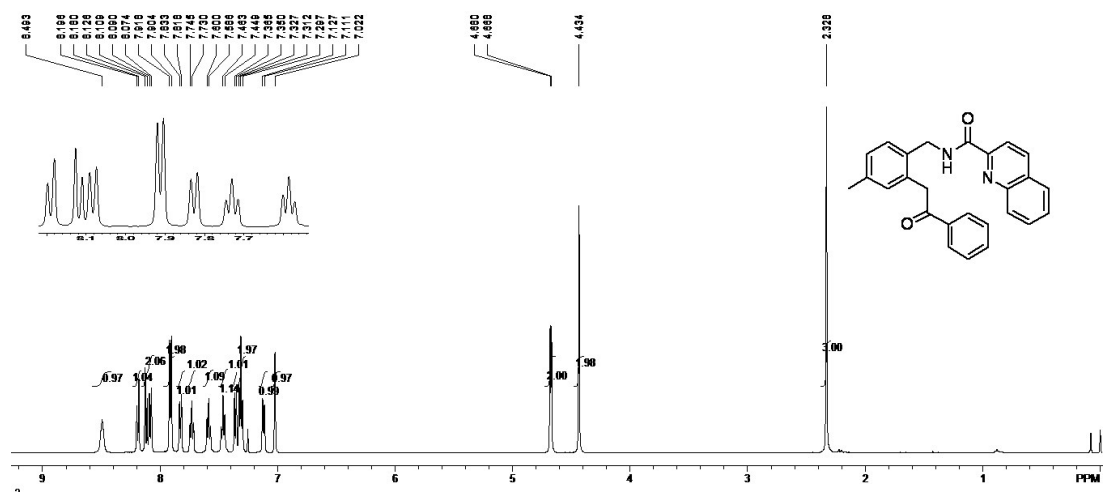

<sup>1</sup>H NMR of product 3ya

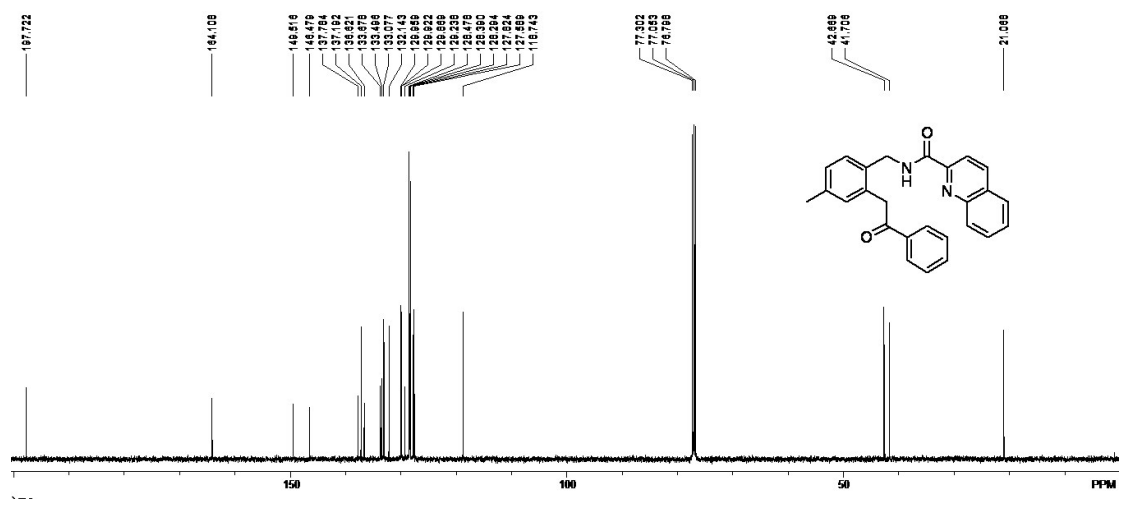

<sup>13</sup>C NMR of product 3ya

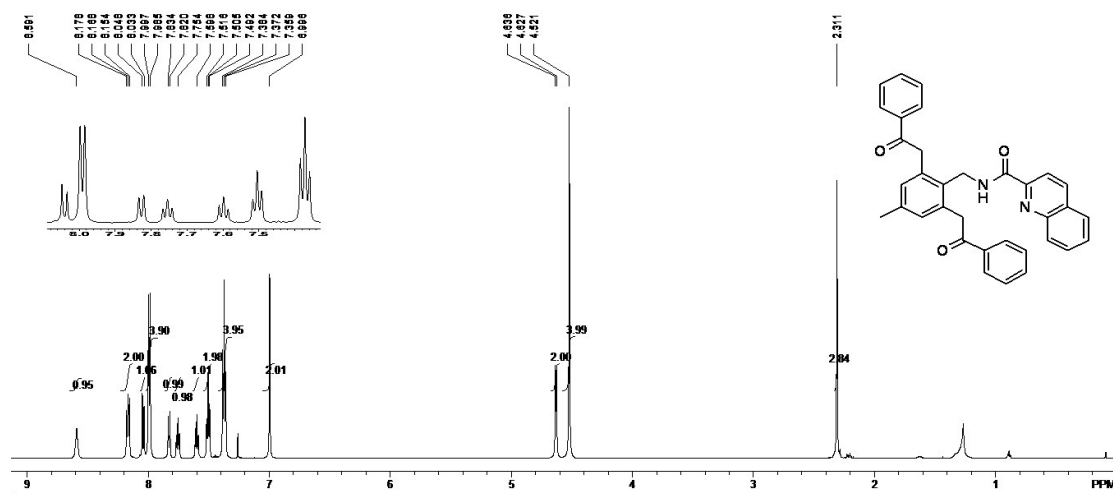

<sup>1</sup>H NMR of product 3yb

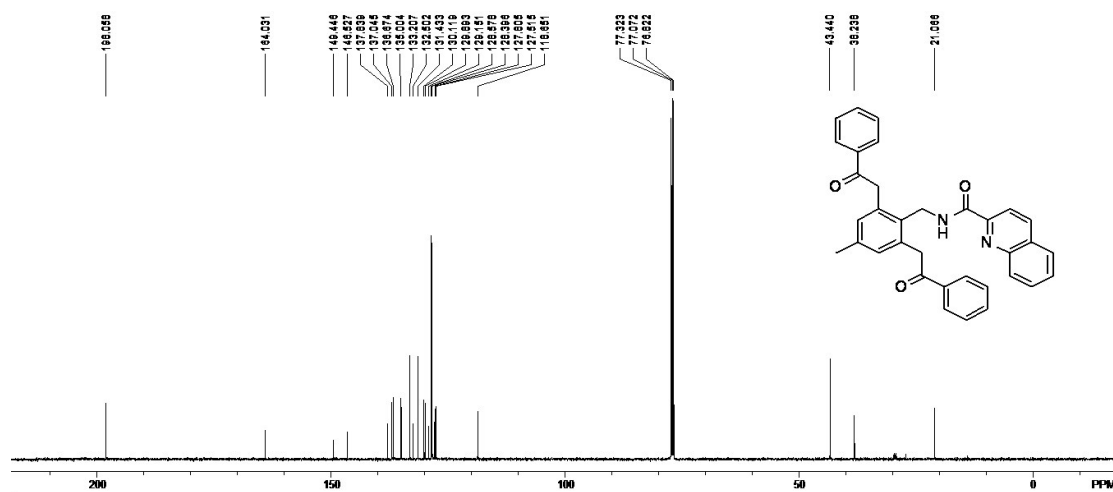

<sup>13</sup>C NMR of product 3yb

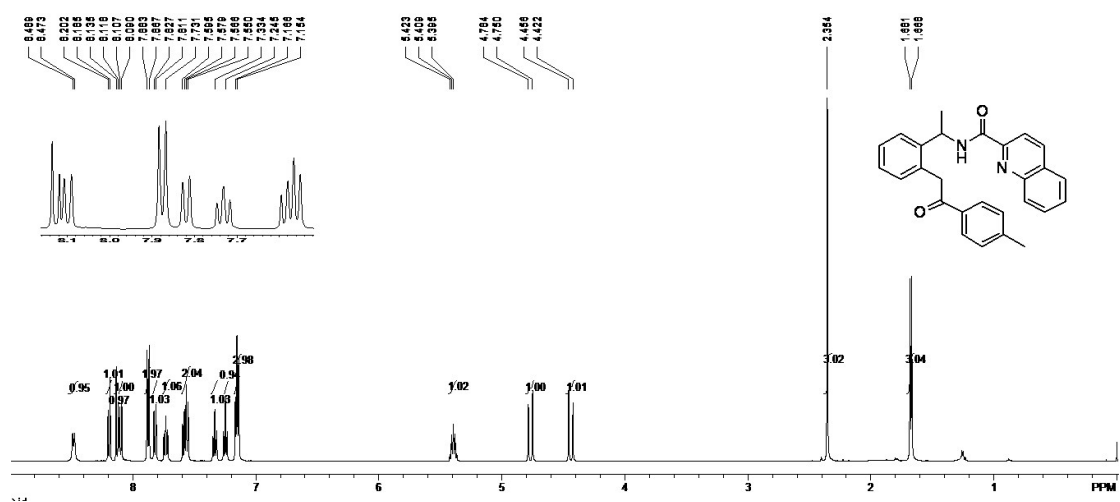

<sup>1</sup>H NMR of product **3za**

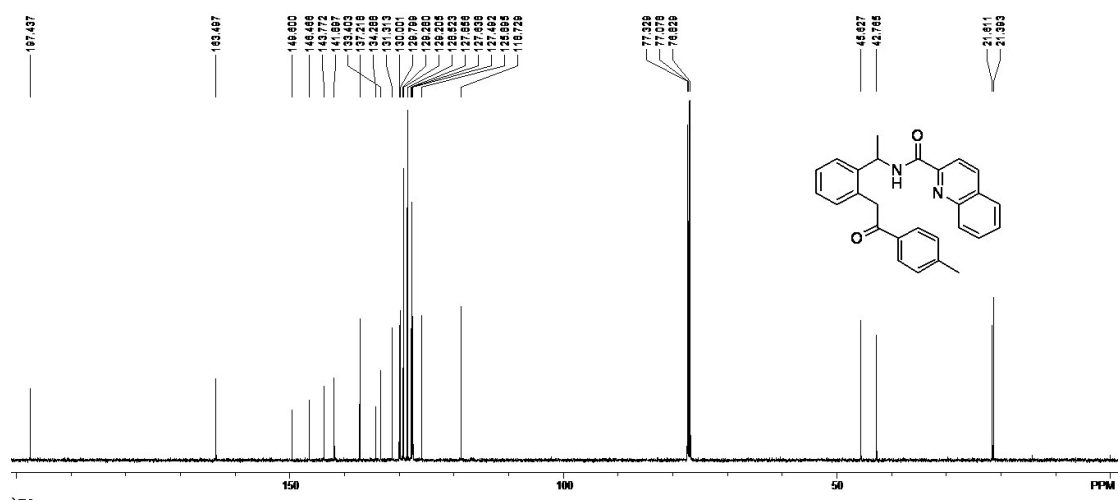

<sup>13</sup>C NMR of product **3za**



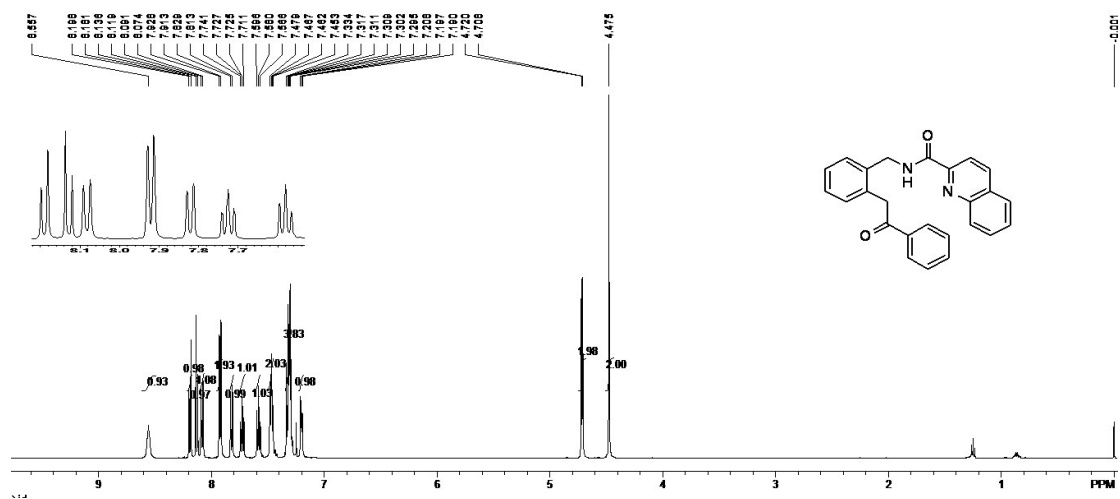

$^1\text{H}$  NMR of product **3z'a**

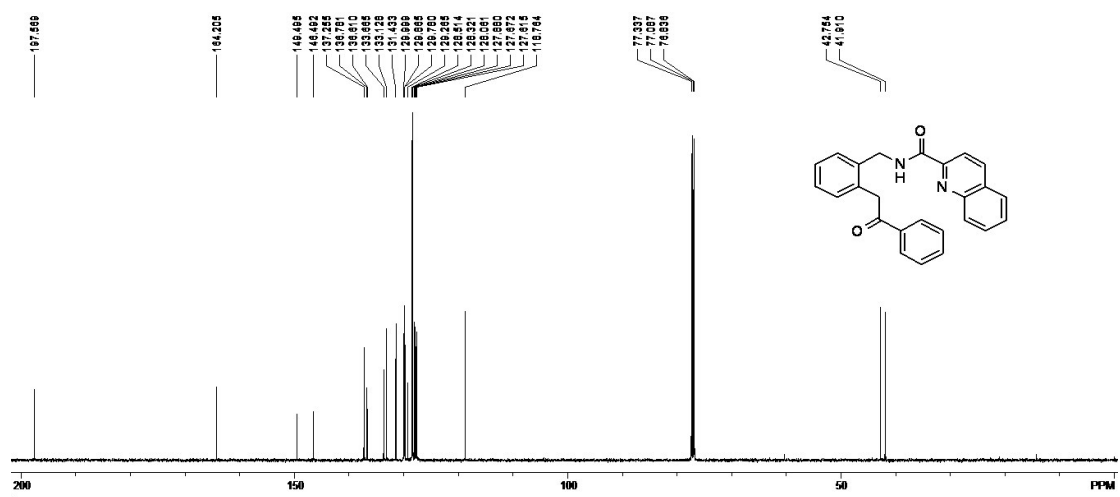

$^{13}\text{C}$  NMR of product **3z'a**

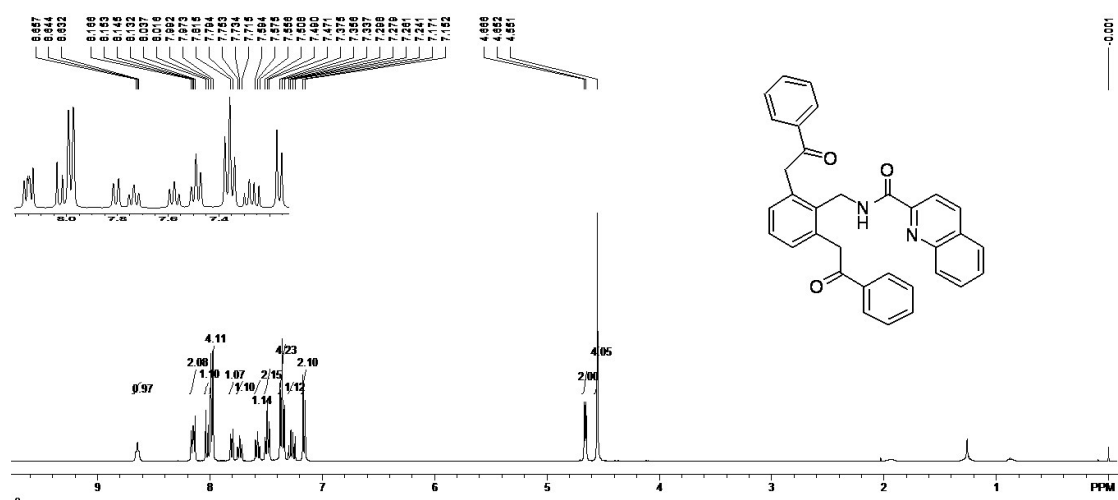

<sup>1</sup>H NMR of product **3 z'b**

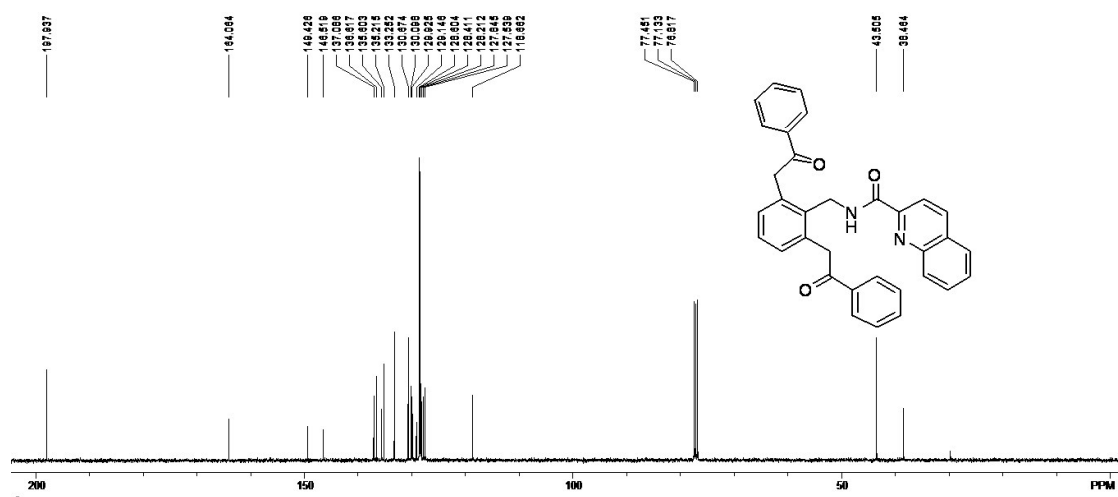

<sup>13</sup>C NMR of product **3 z'b**

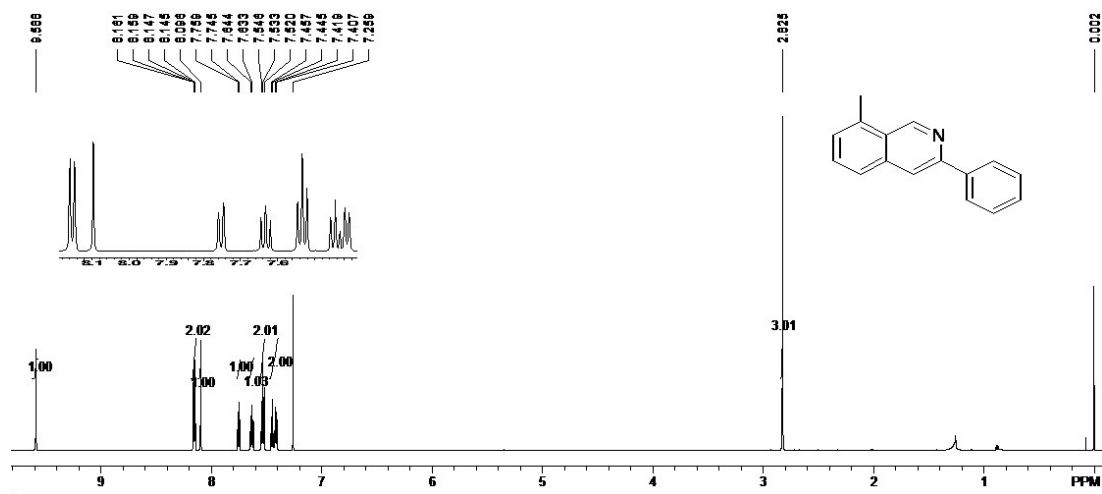

<sup>1</sup>H NMR of product 4a

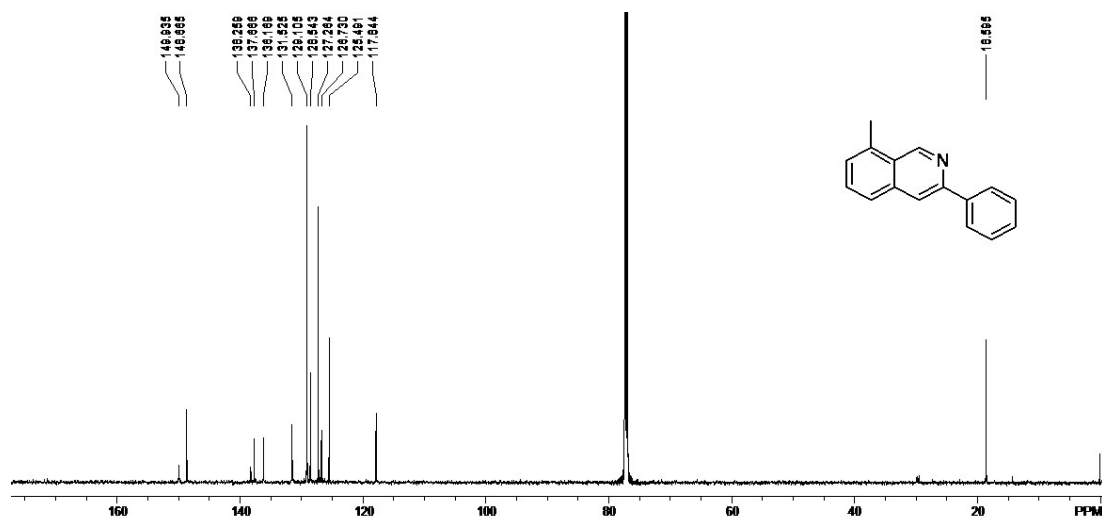

<sup>13</sup>C NMR of product 4a

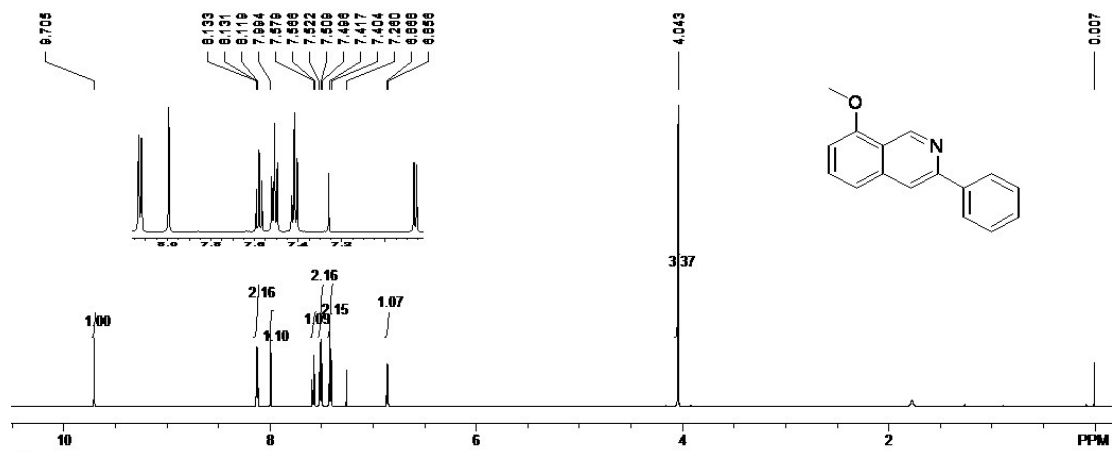

<sup>1</sup>H NMR of product **4b**

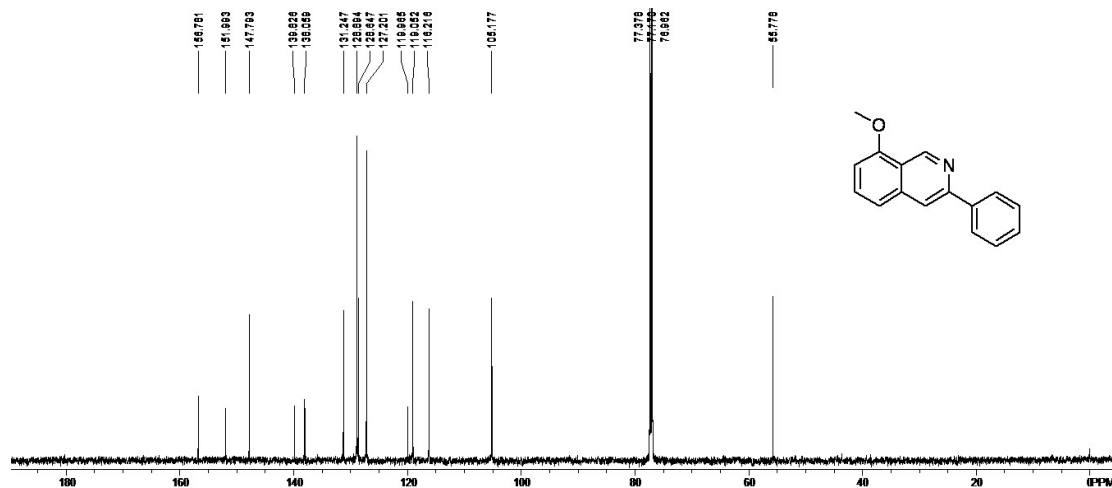

<sup>13</sup>C NMR of product **4b**



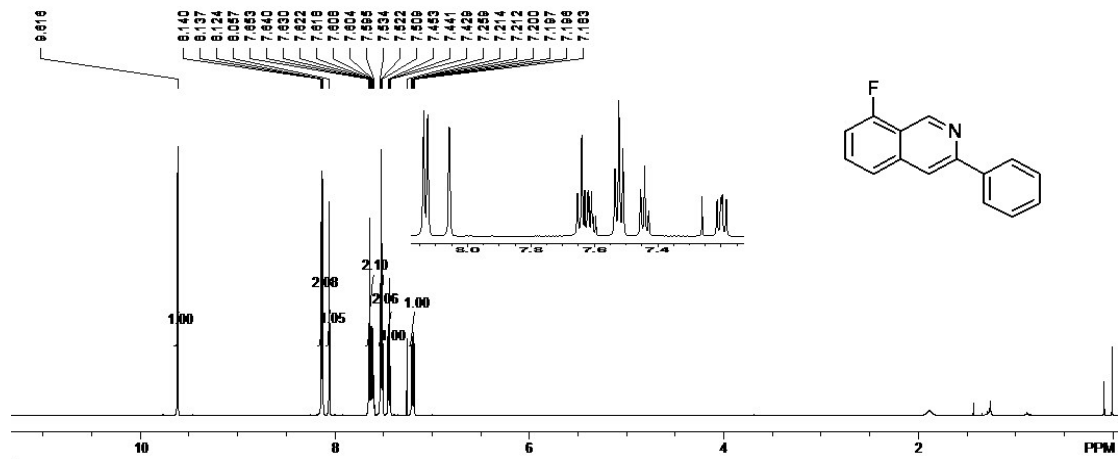

<sup>1</sup>H NMR of product 4c

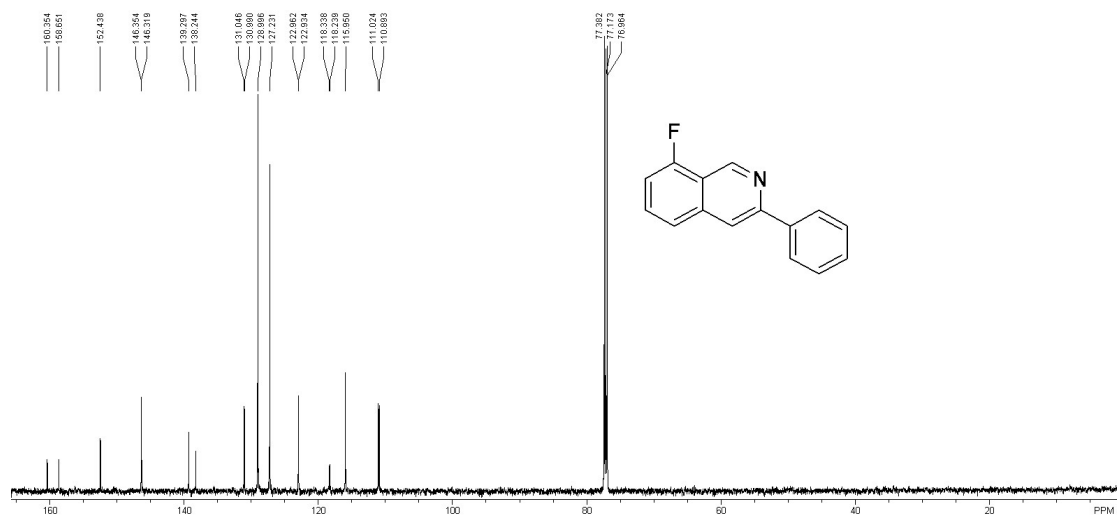

<sup>13</sup>C NMR of product 4c

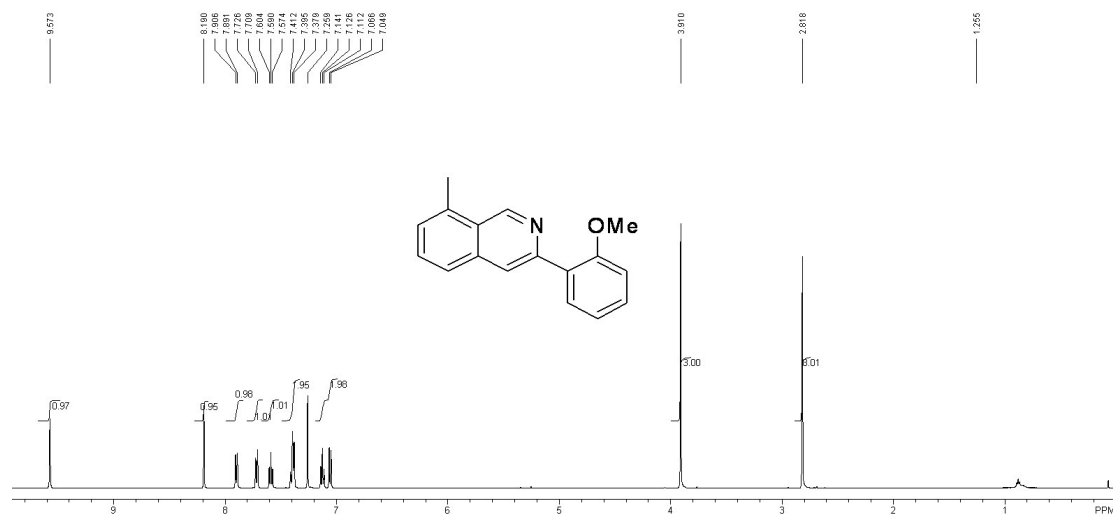

<sup>1</sup>H NMR of product 4d

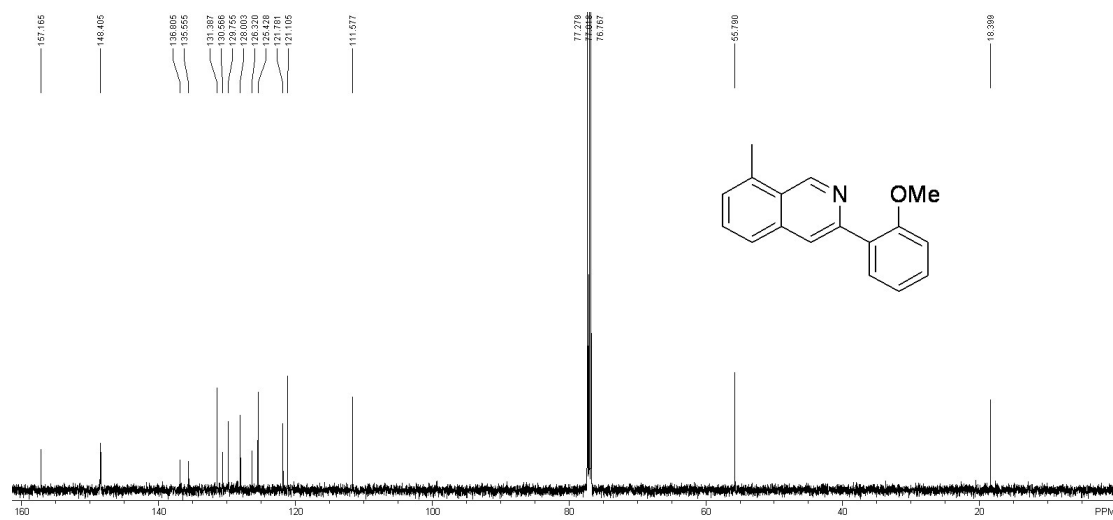

<sup>13</sup>C NMR of product 4d
